26 **Abstract**

27 The bovine clinical mastitis (CM) milk is a large reservoir for diverse groups of resistomes,  
28 which play important roles in the pathogenesis of mastitis, but little is known about the  
29 concurrence of CM microbiome signature and its associated resistomes. Here we deciphered  
30 the total resistance (antibiotics and metals resistance, biofilm formation, quorum sensing)  
31 present in CM microbiome using whole metagenome sequencing (WMS) and *in vitro* cultural  
32 approaches. Significant correlation ( $p=0.001$ ) was found between the resistome diversity and  
33 microbiome signature. We identified the strain-level microbiome diversity in four cattle  
34 breeds, with microbiome composition represented by the phyla *Proteobacteria*,  
35 *Bacteroidetes*, *Firmicutes*, *Actinobacteria* and *Fusobacteria* (contributing to >95.0% of total  
36 strains). However, the resistome diversity did not vary significantly ( $p=0.692$ ) across the  
37 microbiomes of cattle breeds. The *in vitro* investigation showed that biofilm producing CM  
38 pathogens were resistant to most of the conventional antibiotics used for CM treatment,  
39 whereas these pathogens remained sensitive to five heavy metals (Cr, Co, Ni, Cu, Zn) at  
40 varying concentrations. We also found association of some genomic functional potentials  
41 such as bacterial flagellar movement and chemotaxis, regulation and cell signaling, phages-  
42 prophages, transposable elements, plasmids and oxidative stress in the pathophysiology of  
43 bovine CM. These findings of rapid and reliable identification of CM microbiomes and  
44 associated resistomes will help improve the optimization of therapeutic schemes involving  
45 antibiotics and metals usage in the prevention and control programs of bovine CM.

46

47

48

49 **Key words:** Clinical mastitis, diversity, resistome, microbiome.

50

## 51 **Introduction**

52 Mastitis is the foremost production and major economic burden confronted by the  
53 global dairy industry<sup>1-3</sup>. Bovine clinical mastitis (CM) is of special concern for milk  
54 producers in developing countries like Bangladesh, where dairying plays a pivotal role in the  
55 national economy. The CM milk from dairy animals is now considered to host a complex  
56 microbial community with great diversity<sup>2-4</sup>. The most frequently isolated pathogens are  
57 *Staphylococcus aureus*, *Escherichia coli*, *Klebsiella* spp., *Streptococcus* spp., *Mycoplasma*  
58 spp., *Enterobacter* spp., *Bacillus* spp., *Corynebacterium* species<sup>5-8</sup>. Therefore, accurate  
59 identification of pathogens causing CM enables appropriate choices for antimicrobial  
60 treatment and preventive mastitis management<sup>8-10</sup>. Over the past two decades, a wide range of  
61 phenotyping and genotyping methods have been implemented to study mastitis-causing  
62 bacteria<sup>6-9</sup>. Although culture-based techniques are in the forefront of detecting CM bacteria,  
63 these methods are time-consuming and have inherent drawback of not being applicable to  
64 non-cultivable bacteria<sup>11</sup>. Until recently, 16S rRNA partial gene sequencing remained as the  
65 most commonly used genomic survey tool to study bovine mastitis microbiomes<sup>3,4,12</sup>.  
66 However, this technique has limitations because of polymerase chain reaction (PCR) bias,  
67 lower taxonomic resolution at the species level, and limiting information on gene abundance  
68 and functional profiling<sup>13</sup>. Shotgun whole metagenome sequencing (WMS), on the other  
69 hand, produces a metagenome reflecting the breadth of microbial genomic content in a  
70 sample and successfully provides insights into the phylogenetic composition, species and/or  
71 strain and functional diversity for a variety of biomes<sup>2,13,14</sup>. This WMS typically produces  
72 high complexity datasets with millions of short reads allowing extensive characterization of  
73 microbiome in an ecological niche<sup>13,14</sup> and profiling of their functional attributes like  
74 microbial energy metabolism, antimicrobial resistance and biofilm forming abilities; and  
75 gradually becoming a cost-effective metagenomic approach<sup>13</sup>. The cattle breeds or host

76 genetics may have an influence on the milk microbiota composition and on susceptibility to  
77 disease and resistance to bacterial infection<sup>12,15</sup>. The milk from healthy Holstein Friesian  
78 cows displayed more significant changes bacterial biodiversity and composition than  
79 microbiota in Rendena cows milk<sup>12,16</sup>.

80         The secretion of antimicrobial compounds by microbes is an ancient and effective  
81 method to improve the survival of microbes competing for space and nutrients with other  
82 microorganisms<sup>17</sup>. However, the advent recent metagenomic studies have revealed  
83 diverse homologues of known resistance genes broadly distributed across  
84 environmental locales including bovine milk samples. This widespread dissemination  
85 of antimicrobial resistance elements is inconsistent with a hypothesis of contemporary  
86 emergence and instead suggests a richer natural history of resistance<sup>18</sup>. The vast  
87 diversity of bacterial species in CM milk coupled with short generation times and horizontal  
88 gene transfer permit the rapid accumulation of countless resistance variations at a relatively  
89 high evolutionary pace<sup>19</sup>. Resistance in CM bacteria typically goes unnoticed until a given  
90 species becomes of clinical interest, and the resistome found CM is also suspected to be a  
91 source of newly emerging resistance genes in the CM<sup>2,8,17,20</sup>. Antibiotics have been used for  
92 decades in livestock production for both therapeutic (e.g. treatment of specific diseases) and  
93 nontherapeutic (growth promotion) purposes<sup>10</sup>. However, there are data that support the fact  
94 that both nontherapeutic and therapeutic doses of antibiotics can contribute to the emergence  
95 of antimicrobial-resistant bacteria, thus exacerbating the problem of antibiotic resistance in  
96 animal and human pathogens<sup>10</sup>, and enhancing the selection for antibiotic resistance genes  
97 (ARGs) and the horizontal transfer of these genes<sup>10,17</sup>. Bacteria residing in the bovine  
98 gastrointestinal tract and udder may become resistant to these antibiotics and, once released  
99 into the milk, they may transfer ARGs to other CM bacteria of contagious and environmental  
100 origin<sup>8,20</sup>. Efficacy of antimicrobial therapy against bovine CM pathogens is low<sup>8</sup>, and the use

101 of antibiotics, confined to selected severe CM cases necessitates the accurate identification  
102 and characterization of pathogens and antibiotic selection for its better prevention and  
103 control<sup>1,8</sup>. Furthermore, antimicrobial resistance (AMR) is a global health concern in both  
104 human and veterinary medicine<sup>10</sup>, and thus, monitoring the emergence of AMR bacterial  
105 strains is an essential component of bovine CM prevention and control strategies<sup>8,21</sup>.  
106 Therefore, finding an effective alternative strategy for the control of bovine mastitis is a  
107 challenge for dairy producers.

108 The antimicrobial properties of metals have been documented throughout the history  
109 of medicine and healthcare<sup>22</sup>. The metal salts such as chromium (Cr), cobalt (Co), nickel (Ni),  
110 copper (Cu) and zinc (Zn) are effective in controlling bacterial transmission and infection  
111 risks<sup>22</sup>. However, their uses are limited due to their toxicity and possible detrimental  
112 environmental effects in dairy industries particularly as therapeutic agents against bovine CM  
113 pathogens. Biofilm formation is an important virulence factor for mastitis causing bacteria  
114 and contributes to the resistance to different classes of antimicrobials<sup>23</sup>. Bacterial pathogens  
115 identified in this study showed broad spectrum of antimicrobial (antibiotics, toxic metals)  
116 resistance, and possessed biofilm forming and quorum sensing abilities, which might be the  
117 potential factors hindering CM cures, thereby leading to the persistence of the disease, and  
118 increased risk of transmission to non-infected dairy cows. Genetic information about  
119 resistance or *in vitro* assays of resistance is not enough to understand about resistomes when  
120 considered solely rather in combination<sup>10,11</sup>. Genetic potential doesn't give the idea of  
121 resistance level as many other factors are involve such as expression, stimulation, stress  
122 etc<sup>10,11,15</sup>. Similarly, resistance assay doesn't give the idea about genetic makeup responsible.  
123 Therefore, our present study describes the resistome diversity across microbial communities  
124 causing CM in four major cattle breeds (Local Zebu, LZ; Red Chattogram Cattle, RCC;  
125 Sahiwal, SW; Crossbred Holstein Friesian; XHF) of Bangladesh using both metagenomic

126 deep sequencing (WMS) and *in vitro* cultural approaches. Furthermore, we also aimed to  
127 investigate the influences of metabolic genomic potentials of the microbiomes in the  
128 pathophysiology of bovine CM.

129

## 130 **Results**

131 To decipher the resistome diversity in bovine CM microbiomes, we used a condition of  
132 combination of *in silico* (WMS, 16S rRNA gene sequencing) and *in vitro* (culture base)  
133 approaches. The present WMS investigation leads to the direct and comprehensive evaluation  
134 of resistance to antibiotics and toxic compounds (RATC), biofilm formation (BF) and  
135 quorum sensing (QS) genes in 25 CM samples. Furthermore, *in vitro* antimicrobial resistance  
136 profiling of six CM causing bacteria (*S. aureus*, *E. coli*, *Klebsiella*, *Enterobacter*, *Bacillus*  
137 and *Shigella*) isolated from 260 milk samples was carried out using 12 commonly used  
138 antibiotics (ampicillin, doxycycline, tetracycline, nitrofurantoin, ciprofloxacin, nalidixic acid,  
139 cefoxitin, imipenem, chloramphenicol, gentamycin, erythromycin, vancomycin), and five  
140 toxic metals (copper, zinc, chromium, nickel, cobalt). Moreover, we also demonstrated some  
141 functional metabolic potentials of CM microbiomes found to be associated with mammary  
142 gland pathogenesis.

## 143 **Sequence analysis**

144 The WMS of 25 CM milk samples generated approximately 600 million reads, ranging  
145 from 8.86 to 39.75 million per sample. An average of 21.13 million reads per sample  
146 (maximum=36.89 million, minimum=4.71 million) passed the quality control step  
147 (Supplementary Data 1). We analyzed the sequencing reads simultaneously using two  
148 bioinformatics pipelines, PathoScope 2.0 (PS) and MG-RAST (MR).

149

150

## 151 **Microbiome diversity and composition in CM**

152 We investigated the strain-level microbial community and relative abundances in 25 CM milk  
153 samples (previously published 14 samples<sup>2</sup> and 11 new samples) through WMS. The reads  
154 generated from WMS mapped to 391 genera and 519 strains of bacteria through MR and PS  
155 analyses, respectively (Supplementary Data 1).

156 The rarefaction curves based on observed species richness reached a plateau after, on  
157 average, 23.87 million reads (Fig. 1a, Supplementary Data 1)-suggesting that the depth of  
158 coverage for most samples was sufficient to capture the entire microbial diversity within each  
159 sample. Although, we did not find any significant differences in the alpha (observed species,  
160 Chao1, ACE, Shannon, Simpson and Fisher diversity estimates) and beta (based on Bray-  
161 Curtis dissimilarity matrix) diversities among the microbial communities across the 25 CM  
162 samples (Fig. 1b,c). However, significant diversity (alpha and beta) differences were  
163 observed among the CM microbiome communities across the four cattle breeds (LZ, RCC,  
164 SW, XHF) regardless of the method (i.e., either PS or MR) used to tabulate microbial  
165 abundances (PS;  $p=0.005$ , MR;  $p=0.001$ , Kruskal–Wallis test). In addition, this breed specific  
166 diversity difference remained evident in the microbial ecosystem of XHF cows associated  
167 CM milk samples (Fig. 1d,e). The PCoA analysis also showed significant microbial disparity  
168 ( $p=0.001$ ) among the microbiome of four dairy breeds (Fig. 1e).

169 The predominant bacterial phyla were *Proteobacteria*, *Bacteroidetes*, *Firmicutes*,  
170 *Actinobacteria* and *Fusobacteria* (contributing to >95.0% of the total sequences, Kruskal–  
171 Wallis test,  $p=0.001$ ) in the MR analysis. The strain-level signature of the microbiome  
172 demonstrated that most of the species identified in each CM sample represented by multiple  
173 strains (Supplementary Data 1), and of the detected bacterial strains, the top 200 strains  
174 (according to their relative abundance) are depicted in Fig. 2. The CM associated microbiome  
175 was dominated by 29 different strains of *Pseudomonas* species, while *Acinetobacter*,

176 *Streptococcus*, *Lactobacillus*, *Corynebacterium*, *Staphylococcus* and *Enterococcus* species  
177 represented by 27, 27, 18, 17, 15 and 10 different strains, respectively (Fig. 2, Supplementary  
178 Data 1). Thus, among the identified bacterial strains, *A. johnsonii* XBB1 had the highest  
179 relative abundance (38.9%) and followed by *Micromonospora* sp. HK10 (17.6%). Other  
180 bacterial strains found abundantly were *Campylobacter mucosalis* (8.7%), *P. putida* KT2440  
181 (7.7%), *Anaerobutyricum hallii* DSM 3353 (6.3%), *P. fragi* (3.2%), *Catenibacterium*  
182 *mitsuokai* DSM 15897 (3.0%), *E. coli* O104:H4 str. 2011C-3493 (2.0%), *A. veronii* (1.2%),  
183 *Pantoea dispersa* EGD-AAK13 (1.1%), *P. fluorescens* Pf0-1 (0.8%), *K. oxytoca* (0.7%) and  
184 *P. entomophila* L48 (0.5%). The remaining strains had a relatively lower abundance (<0.5%)  
185 (Supplementary Data 1). According to the cattle breeds, the XHF cows had the highest  
186 number of microbial strains (n=403) followed by LZ cows (n=230), SW cows (n=134) and  
187 RCC (n=125) (Fig. 3a-c, Supplementary Data 1). The breed specific association revealed that  
188 45.7, 22.6 and 19.1% of the detected bacterial strains in CM milk samples of LZ, SW and  
189 RCC cows, respectively, were also found in the CM microbiome of XHF cows (Fig. 3d,  
190 Supplementary Data 1).

191 Simultaneously through *in vitro* cultural analysis, a total of 452 isolates that belonged  
192 to six bacterial (*S. aureus*, *E. coli*, *Klebsiella*, *Enterobacter*, *Bacillus* and *Shigella*) species  
193 were identified in 260 CM samples (including 25 WMS CM samples) collected from central  
194 (CR=160) and southeastern (SER=100) regions of Bangladesh (Supplementary Fig. 1). The  
195 overall prevalence of *S. aureus*, *E. coli*, *Klebsiella*, *Enterobacter*, *Bacillus* and *Shigella*  
196 species were 23.5, 18.5, 19.2, 12.3, 9.2 and 17.3% CM samples, respectively (Supplementary  
197 Table 1). We found significant differences in the prevalence of these species ( $p=0.01$ ) when  
198 analyzing the distribution of these pathogens according to the origin of the samples (SER and  
199 CR) (Supplementary Fig. 2). The culture-based findings of the current study demonstrated *S.*  
200 *aureus* as the chief etiology of bovine CM in Bangladesh, while *Shigella* species remained as



201 the least frequently detected CM pathogen – which corroborates with the results of WMS-  
202 based taxonomic identification (Supplementary Fig. 3).

### 203 **Resistomes diversity and composition of CM microbiome**

204 For analyses of resistome diversity and abundance in CM microbiomes, the SEED  
205 module of the MR pipeline provided a comprehensive picture. Using SEED, 147,040 reads  
206 aligned to 30 resistance to antibiotics and toxic compounds (RATC) and 10 biofilm  
207 formation and quorum sensing (BF-QS) functional groups across the CM samples with  
208 different abundances (Supplementary Data 2). The RATC genes classified into two unique  
209 groups, 19 antibiotic resistance and 11 toxic metal resistance groups (Fig. 4, Supplementary  
210 Data 2). This WMS analysis showed significant correlation (Pearson correlation,  $p=0.001$ ;  
211 Nonparametric Spearman's Correlation,  $p=0.003$ ) between the number of reads aligned to  
212 bacterial genomes and number of reads mapped to RATC genes (Supplementary Data 2).  
213 Among the RATC functional groups, multidrug resistance to efflux pumps (MREP, 28.6%),  
214 *CmeABC* operon (8.9%), resistance to fluoroquinolones (RFL, 6.2%), *mdtABCD* cluster  
215 (5.5%), methicillin resistance in *Staphylococci* (MRS, 3.8%), *BlaR1* regulatory family  
216 (*BlaR1*, 3.4%), *MexE-MexF-OprN* (2.4%) and beta-lactamase resistance (BLAC, 2.2%) were  
217 the dominating antibiotic resistance genes (ARGs) found in CM milk microbiomes (Fig. 4a,  
218 Supplementary Data 2). In addition to ARGs, the WMS analysis also detected a number of  
219 metal and toxic compound resistance (MTR) genes in CM microbiomes. Among them,  
220 cobalt-zinc-cadmium resistance (CZCR, 19.3%), copper homeostasis (CH, 9.6%), arsenic  
221 resistance (AR, 2.9%), copper homeostasis: copper tolerance (CHCT, 2.3%) and resistance to  
222 chromium compounds (RCHC, 1.4%) were the predominating resistant genes (Fig. 4a,  
223 Supplementary Data 2). Although the relative abundance of these RATC genes varied  
224 among the microbiomes of the four breeds (LZ, RCC, SW and XHF), but their resistome

225 diversity did not vary significantly ( $p=0.692$ ) by taxonomic diversity of respective breeds  
226 (Fig. 4b, Supplementary Data 2).

227         The diversity and composition of RATC functional groups also varied significantly  
228 ( $p=0.027$ ) in *in vitro* selected six CM pathogens isolated and identified from different sources  
229 of CM samples (breed and study areas) under almost same farming management system (Fig.  
230 5a, Supplementary Data 2). Among the RATC groups, the predominant ARGs found as  
231 follows MRS (*S. aureus*, 37.0%), RFL (*S. aureus*, 14.8%; *Shigella*, 7.8%), MREP (*E. coli*,  
232 28.5%; *Klebsiella*, 28.4%), *Bla*R1 (*E. coli*, 6.0%; *Shigella*, 8.5%), *mdt*ABCD cluster (*E. coli*,  
233 17.5%; *Klebsiella*, 18.9%; *Enterobacter*, 21.4%; *Shigella*, 11.7%), multiple antibiotic  
234 resistance (MAR) Locus (*E. coli*, 2.4%; *Enterobacter*, 2.6%), *Cme*ABC operon (*E. coli*,  
235 9.1%; *Enterobacter*, 11.0%; *Shigella*, 25.6%), and adaptation to d-cysteine, ADCYS  
236 (*Bacillus*, 5.5%) (Fig. 5b). Conversely, genes encoding CH in *S. aureus* (11.1%), *E. coli*  
237 (4.8%), *Enterobacter* (4.4%), and *Shigella* (6.0%), CHCT in *Klebsiella* (11.2%) and *Shigella*  
238 (3.7%), mercuric reductase (MRD) in *S. aureus* (11.1%), mercury resistance to operon  
239 (MROP) in *Enterobacter* (2.4%), AR in *S. aureus* (3.7%), *E. coli* (4.4%), *Klebsiella* (10.1%),  
240 *Enterobacter* (7.5%) and *Shigella* (7.8%), ZR in *E. coli* (5.6%), cadmium resistance (CDR) in  
241 *S. aureus* (3.7%), CZCR in *S. aureus* (3.7%), *E. coli* (10.4%), *Klebsiella* (11.6%),  
242 *Enterobacter* (20.3%) and *Shigella* (21.0%), and RCHC in *Bacillus* (85.0%) were the most  
243 abundant toxic compounds or metals resistant (MTR) RATC functional groups among the six  
244 selected pathogens (Fig. 5c). Assessment of the BF-QS ability of the CM microbiomes  
245 revealed that autoinducer 2 (AI-2) transport and processing (*lsr*ACDBFGE operon, 33.7%),  
246 biofilm adhesion biosynthesis (BAB, 24.2%), protein *YjgK* cluster linked to biofilm  
247 formation (*YjgK* cluster, 15.5%), quorum sensing: autoinducer-2 synthesis (QSAU2, 9.4%)  
248 were the most abundant genes among CM associated pathogens (Supplementary Data 2).  
249 However, by comparing the association of these BF-QS genes among the selected six

250 bacterial pathogens, we found significant variation ( $p=0.017$ ) in their diversity, composition  
251 and relative abundances (Fig. 5d, Supplementary Data 2).

252 The *in vitro* antibiogram profiling of 221 individual isolates of the six bacteria  
253 revealed that *S. aureus* isolates had highest resistance to doxycycline, ampicillin, tetracycline  
254 and erythromycin (73.0 to 88.0%) and moderate resistance to chloramphenicol, ciprofloxacin  
255 and nitrofurantoin (50.0 to 58.0%) (Fig. 6, Table 1). The isolates of another Gram-positive  
256 bacterium (*Bacillus*) demonstrated highest resistance against doxycycline, ampicillin,  
257 nalidixic acid and erythromycin (60.0 to 84.0%). However, *E. coli* isolates exhibited highest  
258 resistance against tetracycline, doxycycline, nalidixic acid and ampicillin (77.0 to 93.0%) and  
259 moderate resistance to chloramphenicol, nitrofurantoin, gentamicin and ciprofloxacin (40.0 to  
260 63.0%). The isolates of *Klebsiella*, *Enterobacter* and *Shigella* species displayed highest  
261 resistance to doxycycline, nalidixic acid, tetracycline and ampicillin (70.0 to 100.0%) and  
262 moderate resistance to ciprofloxacin, gentamicin, nitrofurantoin and chloramphenicol (30.0 to  
263 70.0%). In this study, imipenem and ceftazidime remained as the most sensitive antibiotics  
264 against four Gram-negative bacterial (*E. coli*, *Klebsiella*, *Enterobacter* and *Shigella*) species,  
265 while the two Gram-positive (*S. aureus* and *Bacillus*) species were mostly sensitive to  
266 imipenem, ceftazidime and vancomycin (Fig. 6, Table 1). Taken together, the antibiogram  
267 profile revealed that all of the selected CM pathogens are becoming multidrug resistant  
268 (MDR, resistant to  $\geq 5$  antibiotics) and the highest resistance was found to tetracyclines  
269 (tetracycline and doxycycline) followed by quinolones (nalidixic acid) and penicillin  
270 (ampicillin) groups of antibiotics (Fig. 6, Table 1).

271 The use of heavy metals in soluble forms as an alternative to prevent bovine CM  
272 appears as a novel promising idea supported by several earlier studies<sup>1,22</sup>. Zones of inhibition  
273 (ZOI) assays using the individual metal solution (Cu, Zn, Cr, Co and Ni) demonstrated an  
274 increase in antimicrobial activity which correlated with increased metal ion solution

275 concentration ( $p < 0.001$ ) (Fig. 7). Thus, ZOI assays of metals demonstrated *S. aureus* (ZOI:  
276 25.4 mm) as the most sensitive CM pathogens followed by *Bacillus* (ZOI: 23.4 mm), *E. coli*  
277 (ZOI: 20.6 mm), *Enterobacter* (ZOI:18.9 mm), *Klebsiella* (ZOI:17.8 mm) and *Shigella*  
278 (ZOI:15.4 mm) species (Fig. 7a). The minimal inhibitory concentration (MIC) of the metal  
279 ions demonstrated a varying degree of response against all the tested CM pathogens, and  
280 these bacteria tolerated a wide range of metal concentration (3.4 to 38.1  $\mu\text{g/mL}$ )  
281 (Supplementary Data 2). We compared the highest MIC values of each metal, and found that  
282 highest MIC values decrease in the following order: Zn (38.1  $\mu\text{g/mL}$ , *S. aureus*), Cu (33.2  
283  $\mu\text{g/mL}$ , *S. aureus*), Ni (28.2  $\mu\text{g/mL}$ , *E. coli*), Cr (17.2  $\mu\text{g/mL}$ , *Enterobacter* species), and Co  
284 (15.3  $\mu\text{g/mL}$ , *Bacillus* spp.) (Fig. 7b, Supplementary Data 2). For the MIC of specific  
285 bacteria, the most effective metals were found to be Cr against *Shigella* (3.4  $\mu\text{g/mL}$ ) and  
286 *Klebsiella* (5.8  $\mu\text{g/mL}$ ) species, Ni against *Shigella* (3.5  $\mu\text{g/mL}$ ) species, Co against *Shigella*  
287 (5  $\mu\text{g/mL}$ ) and *Klebsiella* (7.4  $\mu\text{g/mL}$ ) species, and Cu and Zn against *Shigella* (7.5  $\mu\text{g/mL}$ ,  
288 both) species. In contrast, Zn (38.1  $\mu\text{g/mL}$ ) and Cu (33.2  $\mu\text{g/mL}$ ) were the least toxic metals  
289 against *S. aureus* (Fig. 7b, Supplementary Data 2). A similar pattern was demonstrated for the  
290 minimal bactericidal concentration (MBC) with the greatest bactericidal activity for Cr  
291 against *S. aureus* (11.3  $\mu\text{g/mL}$ ) followed by Co against *E. coli* (14.3  $\mu\text{g/mL}$ ), Ni against *S.*  
292 *aureus* (23.1  $\mu\text{g/mL}$ ), Zn against *E. coli* (24.2  $\mu\text{g/mL}$ ), and Cu against *Shigella* (25.1  $\mu\text{g/mL}$ )  
293 species. However, Cu produced equable antimicrobial efficacy as Zn, Cr, Co and Ni against  
294 *Enterobacter* species ( $\leq 25.5 \mu\text{g/mL}$ ) (Supplementary Table 2).

295 To assess BF ability of CM pathogens in *in vitro* condition, we randomly selected 80  
296 isolates (*S. aureus*, 15; *E. coli*, 15; *Klebsiella*, 15; *Bacillus*, 15; *Enterobacter*, 10 and *Shigella*,  
297 10) for BF assay. In this study, 76.2% (61/80) bacterial species were biofilm producers with  
298 significance differences ( $p=0.028$ ), and their categories of BF were strong biofilm forming  
299 (SBF, 28.7%), moderate biofilm forming (MBF, 25.2%), weak biofilm forming (WBF,

300 22.2%) and non-biofilm forming (NBF, 23.7%) (Fig. 8). While investigated individually, *E.*  
301 *coli* (66.7%) remained as the highest biofilm producing CM pathogen followed by  
302 *Enterobacter* (60.0%), *Klebsiella* (46.7%), *S. aureus* (40.0%), *Shigella* (30.0%) and *Bacillus*  
303 (26.7%) species. Our current findings revealed that Gram-negative CM pathogens  
304 (*Enterobacter*, 60.0%; *E. coli*, 40.0%; *Shigella*, 33.3%; *Klebsiella*, 28.6%) had higher biofilm  
305 producing ability than Gram-positive bacteria (*S. aureus*, 16.7%) (Fig. 8a,b). On the contrary,  
306 the majority of the *Bacillus* (73.3%), *Shigella* (70.0%) and *S. aureus* (60.0%) isolates  
307 remained as non-biofilm formers (NBF) (Fig. 8b). Therefore, our current findings of *in vitro*  
308 resistance analysis (antibiotics and metals resistance and biofilm assays) corroborate the  
309 resistome found in metagenome sequencing.

#### 310 **Pathogenic functional potentials genome of the CM microbiomes**

311 We also investigated the possible links between chemotaxis and pathogenicity  
312 through the identification of putative genes or proteins associated with both flagellar motility  
313 and bacterial chemotaxis. The KEGG pathway analysis of MR tool identified 48 protein  
314 families associated with flagellar motility in prokaryotes, and among them, flagellar hook-  
315 length control protein, FliK (27.1%); flagellar biosynthesis proteins, FlhA, FliL, FliP, FlhF,  
316 FlgN, FliS, FlhB, FliO, FliQ (~16.0%); flagellar M-ring protein, FliF (5.6%); and flagellar  
317 regulatory protein, FleQ (5.3%) were predominantly associated with cell motility  
318 (Supplementary Data 2). Twenty six functional genes encoding different proteins were found  
319 to be associated with bacterial chemotaxis (Supplementary Fig. 4, Supplementary Data 2), of  
320 them, methyl-accepting chemotaxis protein, mcp (44.2%); chemotaxis family proteins of  
321 bacterial two component system, CheV, CheA, CheB, CheBR, CheY (~15.0%); aerotaxis  
322 receptor, Aer (7.5%); MotB (5.2%) and MotA (3.1%) were most abundant among these CM  
323 microbiotas (Supplementary Data 2). To explore the role of regulation and cell signaling  
324 mechanisms in mammary gland pathogenesis, using the SEED subsystem module of MR

325 analysis, we found two-component regulatory systems BarA-UvrY/BarA-UvrY(*sirA*) as the  
326 most abundant virulence regulatory gene (84.1%) in CM microbiomes (Supplementary Data  
327 2). Another regulatory and cell signaling gene, endoplasmic reticulum chaperon *grp78* (BiP)  
328 was also found as the single most abundant (93.8%) gene in proteolytic pathways of the CM  
329 associated bacterial strains (Supplementary Fig. 5, Supplementary Data 2). A deeper look at  
330 microbial genes associated with phages-prophages, transposable elements and plasmids  
331 revealed that pathogenicity islands related proteins such as methionine-ABC transporter  
332 substrate-binding protein (33.8%), GMP synthase (27.7%), tmRNA-binding protein; SmpB  
333 (16.0%), heat shock protein 60; GroEL (16.0%) and SSU ribosomal protein; S18p (6.1%)  
334 were predominantly abundant among the CM pathogens (Supplementary Data 2). The  
335 SEED module analysis also enabled us to identify 28 different protein functions associated  
336 with oxidative stress responses among the CM microbiomes which were mostly represented  
337 by catalase related proteins (26.7%), Cu-Zn-Fe-Mn mediated superoxide dismutases (12.7%),  
338 H<sub>2</sub>O<sub>2</sub>-inducible genes activator (7.8%) and paraquat-inducible protein B (7.3%) (Fig. 9,  
339 Supplementary Data 2).

340

## 341 **Discussion**

342 Previously, we reported that bovine CM milk microbiomes is a reservoir of diverse groups of  
343 resistome (antibiotics and metal resistance, biofilm formation and quorum sensing genes)  
344 with functional biases in metabolism, bacterial chemotaxis, virulence regulation, compared to  
345 healthy milk microbiomes<sup>2</sup>. In this study, we employed a combination of both *in silico*  
346 (whole metagenome sequencing, WMS) and *in vitro* (culture-based) approaches to elucidate  
347 the resistome diversity in CM associated microbiomes. Recently, the WMS and other high-  
348 throughput sequencing (targeted amplicon) studies have provided new insights into the  
349 structure, function and dynamics of bovine CM milk<sup>2-4,12</sup> and human lactational mastitis

350 milk<sup>24</sup> microbiomes. Our present findings are sufficiently enriched in taxonomic resolution  
351 and predicted protein functions, and corroborates to the findings of several previous studies<sup>2-</sup>  
352 <sup>4,24</sup>. The occurrence of bovine mastitis could be affected by cattle breeds<sup>12,15,16</sup>, and the  
353 diversity of CM-causing pathogens is associated with broad range of host-defense  
354 mechanisms as part of its immunological arsenal<sup>25,26</sup>. We found significant differences in  
355 taxonomic diversity and abundances among the CM microbiomes of four dairy breeds. The  
356 XHF cows suffering from CM had higher microbial diversity at strain-level, and a significant  
357 proportion of the microbiota found to be shared with that of the other three breeds (LZ, SW  
358 and RCC). Consistent with the results of earlier studies<sup>12,15,16,26</sup>, the taxonomic profile of the  
359 CM microbiomes found in four breeds of cows were dominated by phyla *Proteobacteria*,  
360 *Bacteroidetes*, *Firmicutes*, *Actinobacteria* and *Fusobacteria*. This breed specific variation in  
361 taxonomic richness and diversity of microbiome, especially in XHF and LZ cows, could be  
362 associated with their increased disease resistance or immune response<sup>12,15,16</sup> and rumen  
363 microbial features (e.g., taxa, diversity indices, functional categories, and genes)<sup>26</sup>. However,  
364 further investigations will be necessary to evaluate the real effect of breed specific bacteria on  
365 cow mammary gland diseases.

366       Based on previously available culture-based reports on dairy animal mastitis  
367 pathogens in Bangladesh<sup>6,27</sup> and other countries<sup>1,7-9</sup>, we identified six aerobic bacteria (*S.*  
368 *aureus*, *E. coli*, *Klebsiella*, *Enterobacter*, *Bacillus* and *Shigella*) through 16S ribosomal RNA  
369 (16S rRNA) gene sequencing and phenotypic characterizations, and these findings are in line  
370 with the taxonomic signature of WMS. Recent understanding regarding evolutionary  
371 relationships of major CM causing bacteria are primarily based on 16S rRNA gene  
372 phylogenetic identification along with a few individual gene or protein sequences<sup>28</sup>, which  
373 often produces conflicting phylogenies. This study also explored that the prevalence of CM  
374 milk pathogens could vary according to geographical locations and farming (semi-intensive



375 to intensive grazing system in SER, semi-intensive to free-range grazing systems in CR)  
376 systems<sup>1</sup>. These differences may imply that the etiology of bovine CM in Bangladesh could  
377 be related to the breed/host genetic factors<sup>12,15,16,26</sup>, types of feeding and farm locations and  
378 types<sup>1</sup>, and types of antibiotics and/or metals used for treatment or other factors as have been  
379 described in other countries<sup>1,8,9</sup>.

380 Data presented here coupled with the data reported in our earlier study<sup>2</sup> provides important  
381 insights into the diversity of resistomes in CM microbiomes. Our results are concordant with  
382 MDR bacteria reported elsewhere from the milk of clinically infected cows<sup>8,15,21</sup>, buffalo  
383 cows<sup>9</sup> and humans<sup>11,29</sup>. Our findings linked multidrug resistance to efflux pumps (MREP),  
384 *CmeABC* operon, *mdtABCD* cluster, *BlaR1* family, methicillin resistance in *Staphylococcus*  
385 (MRS), resistance to fluoroquinolones (RFL), and multiple metals resistance to CZCR and  
386 AR as the predominantly abundant antibiotics and toxic compounds resistance (RATC)  
387 functional groups in CM microbiomes suggesting that bovine CM milk microbiome  
388 constitutes a good reservoir for antimicrobial resistance<sup>2,11,29-33</sup>. It has been reported that  
389 efflux pumps regulated by two-component systems in several pathogens, including *A.*  
390 *baumannii* and *K. pneumonia*, provide multidrug resistance, which may limit the treatment  
391 options against bacterial infections of the mammary glands<sup>31,32</sup>. Relative over-expression of  
392 efflux pumps enhances the resistances to antimicrobials by reducing the accumulation of  
393 antibiotics inside of the bacterial cells and providing sufficient time for the bacteria to adapt  
394 to the antibiotics (slow phase antibiotic efflux), and through mutations or alteration of  
395 antibiotic targets<sup>31,33</sup>. The *CmeABC* operon is highly potent against multiple antibiotics,  
396 promotes the emergence of ARGs, and confers exceedingly high-level resistance to  
397 fluoroquinolones<sup>33</sup>. Therefore, multidrug resistance to efflux pumps and multiple heavy  
398 metals resistance represented ubiquitous resistance mechanisms among CM microbiomes,  
399 which might be associated with unethical overuse of antibiotics in dairy animals<sup>8,9,15,19-21</sup> and



400 extensive application of toxic chemicals and metals in agricultural use<sup>1,22,34</sup> or might have a  
401 function in the gut microbiome that is still unknown<sup>13, 29,35,36</sup>. The RATC genes detected in  
402 this study are of particular interest because there is concern that the use of this class of  
403 antibiotics or metals in veterinary medicine, particularly for food animals, may contribute to  
404 the development of resistance to this class of antimicrobial options in human<sup>29,35</sup>.

405 *In-vitro* antibiogram of this study report higher prevalence of resistance to tetracyclines  
406 (tetracycline and doxycycline), quinolones (nalidixic acid), penicillins (ampicillin) and  
407 phenols (chloramphenicol), similar findings were observed in previous studies on bovine  
408 mastitis<sup>8,9</sup>. The AMR profile of bovine CM pathogens for different antimicrobials could vary  
409 according to the type and origin of bacteria<sup>8-10</sup> and host-population such as bovine<sup>8,21</sup> and  
410 bubaline cows<sup>9</sup>. Consistent with bacterial needs, heavy metals can be transformed (e.g.,  
411 oxidized, reduced, methylated, or complexed) and used as a source of energy, terminal  
412 electron acceptors, or enzyme structural elements<sup>34</sup>. The highest abundance of CZCR genes  
413 among CM pathogens is mainly due to the presence of Co, Zn, and Cd detoxification  
414 systems<sup>34</sup>. Although the knowledge on uncontrolled spread of ARGs in bovine mastitis  
415 pathogens<sup>8</sup> are increasing, but information on toxic compounds or heavy metal resistance is  
416 yet unavailable. In this study, heavy metals (Cr, Co, Ni and Cu) tested for antibacterial  
417 sensitivity showed good efficacy, although knowledge on their mode of action is limited.  
418 Thus, with the increase of MDR bacteria in CM, it is imperative that new biocidal and  
419 antimicrobial formulations are needed. The MIC and MBC tested metals revealed effective  
420 antimicrobial efficacies against a wide range of AMR pathogens<sup>1,22,36</sup>. We found that Cr and  
421 Co compounds had the highest antimicrobial efficacy (MIC) against all of the tested bacteria  
422 supported by several previous studies<sup>22,37</sup>. Furthermore, our present findings also suggested  
423 that the host genetic component in cattle breeds can significantly regulate the composition of  
424 the milk microbiome<sup>12,15,16</sup>, albeit not associated with resistomes profiles. Biofilm formation

425 is an important virulence factor that may result in recurrent or persistent udder infections<sup>38</sup>  
426 and treatment failure through increased resistance to antibiotics and protection against host  
427 defences<sup>39</sup>. The relative overexpression of genes encoding *lsrACDBFGE* operon, biofilm  
428 adhesion biosynthesis (BAB), protein *YjgK* cluster and quorum sensing: autoinducer-2  
429 synthesis (QSAU2) in CM microbiomes is in accordance with several earlier reports<sup>2,39,40</sup>. In  
430 this study, the relative abundance of the predicted proteins for biofilms and quorum sensing  
431 (BF-QS) varied significantly among the selected six bacterial taxa. The BF and QS can be  
432 the strain specific or genetically linked traits, representing a selective advantage in  
433 pathogenesis of bovine CM<sup>40</sup>. BF can enhance proliferation of reactive oxygen and nitrogen  
434 species<sup>34</sup> that can survive antibiotic treatment leading to the transfer of ARGs<sup>41</sup>. In this  
435 study, overall, 76.2% of the isolates were detected as biofilm formers, and their ability to  
436 producing biofilm varied significantly<sup>38,39</sup>. A large number of food spoilage and/or  
437 pathogenic bacteria, including *Enterococcus faecalis*, *Enterobacter* spp., *Pseudomonas* spp.,  
438 *Klebsiella* spp., *S. aureus*, *E. coli*, *B. cereus*, and others, have already been associated with  
439 biofilms from dairy niches<sup>22,23,38-40</sup>, which supports our current findings.

440 Bacterial chemotaxis mediated by flagellar activities<sup>41</sup>, and the flagella mediated  
441 virulence factors are found in many pathogenic species of bovine CM microbiomes, making  
442 them a potential target for new antibacterial therapeutics<sup>41</sup>. The intra- and interspecies cell-to-  
443 cell communication in bovine CM microbiomes were associated with 26 different genes,  
444 which might have vital roles in the early phase of mastitis for attachment to or entry into the  
445 udder tissues and virulence regulation<sup>42</sup> and bacterial colonization in mammary tissues like  
446 other suitable sites<sup>43</sup>. The cheA-cheY two-component system mediated bacterial chemotaxis  
447 also facilitates the initial contact of bacteria with mammary gland epithelial cells and  
448 contribute to effective invasion<sup>44</sup>. The two-component signal transduction system BarA-UvrY  
449 regulates metabolism, motility, biofilm formation, stress resistance, virulence and quorum

450 sensing in CM pathogens by activating the transcription of genes for regulatory small  
451 RNAs<sup>45</sup>. The up-regulation of genes coding for proteolytic activity, *grp78* (BiP) during  
452 host-pathogen interactions in CM is associated with endoplasmic reticulum (ER) stress  
453 which further triggers proteolytic activities to initiate the mechanism of pathogenesis and  
454 cell death<sup>46</sup>. Catalase activity is a marker of bovine mastitis, which plays a central role in  
455 milk redox control and increases markedly during the pathophysiology of bovine CM<sup>47</sup>. Our  
456 present findings corroborated with previous reports<sup>47,48</sup> that an elevated oxidative stress  
457 mediated by catalase activity might have originated either from the mammary gland and/or  
458 bacterial cells. During the pathogenesis of bovine mammary gland, bacteria are not rapidly  
459 killed by the phagocytic activity of bovine macrophages; rather, they survive within  
460 macrophages during prolonged infection due to secretion of catalase and superoxide  
461 dismutases, which by degrading H<sub>2</sub>O<sub>2</sub> inhibit ROS mediated killing mechanism of the  
462 host<sup>47,48</sup>.

463

## 464 **Conclusions**

465 The bovine CM milk microbiomes harbor diverse groups of resistomes and other virulence  
466 factors. The diversity of resistomes positively correlated with the diversity of the microbial  
467 communities. The efflux pumps mediated multidrug resistance, methicillin, fluoroquinolones  
468 and beta-lactamase resistance, and multiple heavy metals (e.g., cobalt, zinc, cadmium, arsenic  
469 and chromium) resistance were the predominating in CM pathogens. Cattle breed is also a  
470 predominant factor for CM associated microbiome diversity, although resistome diversity  
471 does not affected by the breed specific microbiome signature. In bovine CM, biofilms may  
472 involve in colonizing the pathogens to udder tissues and teat canals, have an important role in  
473 antimicrobials resistance, resistant marker transfer and other virulence expression.  
474 Furthermore, flagellar movement and chemotaxis, regulation and cell signaling, phages-

475 prophages, transposable elements, plasmids and oxidative stress had association with the  
476 pathophysiology of bovine CM. Therefore, accurate and timely identification of CM  
477 microbiome and its associated resistomes along with selection of proper therapeutic regimens  
478 will help improve the antimicrobials stewardship for prevention and control of bovine CM in  
479 Bangladesh.

480

## 481 **Methods**

### 482 **Screening for clinical mastitis (CM) and sampling**

483 We screened 260 quarter milk samples collected from 260 clinical mastitis (CM) affected  
484 cows belonging to 50 smallholding dairy farms in two geographical regions of Bangladesh  
485 (central region, CR=160; southeastern region, SER= 100) (Supplementary Fig. 1). The cows  
486 represented four different breeds, including local zebu (LZ), red Chattogram cattle (RCC),  
487 Sahiwal (SW), and crossbred Holstein Friesian (XHF) at their early stage of lactation (within  
488 10-40 days post-calving). A screening test for CM was conducted using the California  
489 Mastitis Test (CMT<sup>®</sup>, Original Schalm reagent, ThechniVet, USA)<sup>49</sup>. Approximately 15-20  
490 ml of milk from each cow was collected under aseptic conditions in a sterile falcon tube  
491 during the morning milking (8.00-10.00 am), and kept on ice (at 4°C) for transport to the  
492 laboratory for subsequent processing.

### 493 **Metagenomic DNA extraction and sequencing**

494 Genomic DNA (gDNA) from 25 randomly selected CM samples was extracted by an  
495 automated Maxwell 16 DNA extraction platform using blood DNA purification kits  
496 (Promega, UK) following previously described protocols<sup>2</sup>. DNA quantity and purity were  
497 determined with NanoDrop (ThermoFisher, USA) by measuring 260/280 absorbance ratios.  
498 Sequencing libraries were prepared with Nextera XT DNA Library Preparation Kit<sup>50</sup> and  
499 paired-end (2×150 bp) sequencing was performed on a NextSeq 500 machine (Illumina Inc.,

500 USA) at the George Washington University Genomics Core facility. Our metagenomic DNA  
501 yielded 596.74 million reads with an average of 23.87 million (maximum=39.75 million,  
502 minimum=8.89 million) reads per sample (Supplementary Data 1).

### 503 **Sequence reads preprocessing**

504 The resulting FASTQ files were concatenated and filtered through BBDuk<sup>2</sup> (with options  
505 k=21, mink=6, ktrim=r, ftm=5, qtrim=rl, trimq=20, minlen=30, overwrite=true) to remove  
506 Illumina adapters, known Illumina artifacts, and phiX. Any sequence below these thresholds  
507 or reads containing more than one 'N' were discarded. On average, 21.13 million reads per  
508 sample (maximum=36.89 million, minimum=4.71 million) passed the quality control step  
509 (Supplementary Data 1).

### 510 **Microbiome diversity and community analysis**

511 The shotgun whole metagenome sequencing (WMS) data were analyzed using both mapping-  
512 based and assembly-based hybrid methods of PathoScope 2.0 (PS)<sup>51</sup> and MG-RAST (MR),  
513 respectively<sup>52</sup>. In PS analysis, a 'target' genome library was constructed containing all  
514 bacterial sequences from the NCBI Database using the PathoLib module<sup>51</sup>. The reads were  
515 then aligned against the target libraries using the very sensitive Bowtie2 algorithm<sup>53</sup> and  
516 filtered to remove the reads aligned with the cattle genome (bosTau8) and human genome  
517 (hg38) as implemented in PathoMap (-very-sensitive-local -k 100 --score-min L,20,1.0).  
518 Finally, the PathoID<sup>54</sup> module was applied to obtain accurate read counts for downstream  
519 analysis. In these samples, 17.20 million reads (4.3% of total reads) mapped to the target  
520 reference genome libraries after filtering the cow and human genome (Supplementary Data  
521 1). The raw sequences were simultaneously uploaded to the MR server (release 4.0) with  
522 proper embedded metadata and were subjected to the quality filter containing dereplication  
523 and removal of host DNA by screening for taxonomic and functional assignment. Alpha  
524 diversity (diversity within samples) was estimated using the observed species, Chao1, ACE,

525 Shannon, Simpson and Fisher diversity indices<sup>55</sup> for both PS and MR read assignments and  
526 counts. To visualize differences in bacterial diversity, a principal coordinate analysis (PCoA)  
527 was performed based on weighted-UniFrac distances (for PS data) through Phyloseq R  
528 package (version 3.5.1)<sup>56</sup> and Bray-Curtis dissimilarity matrix<sup>57</sup> (for MR data). We have also  
529 used OmicCircos (version 3.9)<sup>58</sup> which is an R package based on python script for circular  
530 visualization of both microbiome diversity and resistance to antibiotics and toxic compounds  
531 (RATC) functional groups found in MR data for respective four breeds of CM cows.

### 532 ***In vitro* identification of bacteria**

533 Collected CM milk samples (n=260) were subjected to selective isolation and identification  
534 of *S. aureus*, *E. coli*, *Klebsiella*, *Enterobacter*, *Shigella* and *Bacillus* species according to  
535 previously described microbiological methods<sup>1,6-9</sup>. The pathogens were identified based on  
536 their colony morphology, hemolytic patterns on blood agar and Gram-staining<sup>8</sup>. Gram-  
537 positive bacteria were further confirmed based on their biochemical characteristics in indole,  
538 methyl red, Voges-Proskauer (VP), catalase, oxidase, urease and triple sugar iron (TSI) tests,  
539 and growth on mannitol salt agar. Gram-negative bacteria were confirmed based on the  
540 results of indole, methyl red, citrate (IMViC) tests and lactose fermentation on Mac agar<sup>9,40</sup>.  
541 Finally, all isolates were stored at -80 °C for further genomic identification.

### 542 **PCR amplification and ribosomal (16S rRNA) gene sequencing**

543 Genomic DNA of probable *S. aureus*, *E. coli*, *Klebsiella*, *Enterobacter*, *Shigella*, and *Bacillus*  
544 species was extracted from overnight cultures using the boiled method<sup>59</sup>. The quantity and  
545 purity of the extracted DNA was determined as mentioned before. The 16S rRNA gene was  
546 amplified using universal primers 27F (5'-AGAGTTTGATCCTGGCTCAG-3') and U1492R  
547 (5'-CTACGGCTACCTTGTTACGA-3')<sup>60</sup>. Agarose gel electrophoresis (1.2% wt/vol) was  
548 used to verify the presence of PCR products. DNA sequencing was carried out at First Base  
549 Laboratories Sdn Bhd (Malaysia) using Applied Biosystems highest capacity-based genetic

550 analyzer (ABI PRISM<sup>®</sup> 377 DNA Sequencer) platforms with the BigDye<sup>®</sup> Terminator v3.1  
551 cycle sequencing kit chemistry<sup>61</sup>.

### 552 **Phylogenetic analysis of the microbial communities**

553 Taxonomic abundance of the WMS data was determined by applying the “Best Hit  
554 Classification” option in PS pipeline using the NCBI database as a reference with the  
555 following settings: maximum e-value of  $1 \times 10^{-30}$ ; minimum identity of 95% for bacteria, and a  
556 minimum alignment length of 20 as the set parameters. A phylogenetic tree consisting of the  
557 top 200 abundant bacterial strains identified through PS analysis from the WMS reads of the  
558 25 CM samples with >90% taxonomic identity was constructed using maximum-likelihood  
559 method in Clustal W (version 2.1)<sup>61</sup> and visualized using interactive Tree Of Life (iTOL)<sup>62</sup>.  
560 Another, phylogenetic tree consisting of 40 strains correspondent to *in vitro* examined six  
561 CM bacteria found in 260 CM samples with >90% taxonomic identity was also constructed  
562 using same methods. Using Molecular Evolutionary Genetics Analysis (MEGA) version 7.0  
563 for bigger datasets<sup>63</sup>, the 16S rRNA gene sequences, amplified from all individual bacterial  
564 isolates, were aligned with each other and with relevant reference sequences obtained from  
565 the NCBI Database, and a maximum-likelihood tree was generated using these 16S rRNA  
566 gene sequences<sup>63</sup>. The percentage of replicate trees in which the associated taxa clustered  
567 together in the bootstrap test (1000 replicates) is shown next to the branches<sup>64</sup>.

### 568 **Antimicrobial susceptibility testing**

569 The *in vitro* antibiogram profile of 221 CM isolates was determined using the disk diffusion  
570 method following the Clinical Laboratory Standards Institute<sup>65</sup> guidelines. Antibiotics were  
571 selected for susceptibility testing corresponding to a panel of antimicrobial agents (Oxoid<sup>™</sup>,  
572 Thermo Scientific, UK) of interest to the dairy industry and public health in Bangladesh. The  
573 selected groups of antibiotics were commonly used in treating CM by the dairy farmers and  
574 included penicillins (ampicillin, 10 µg/mL), tetracyclines (doxycycline, 30 µg/mL;

575 tetracycline, 30 µg/mL), nitrofurans (nitrofurantoin, 300 µg/mL), quinolones (ciprofloxacin,  
576 10 µg/mL; nalidixic acid, 30 µg/mL), cephalosporins (cefoxitin, 30 µg/mL), penems  
577 (imipenem, 10 µg/mL), phenols (chloramphenicol, 30 µg/mL), aminoglycosides (gentamycin,  
578 10 µg/mL; vancomycin, 30 µg/mL), macrolides (erythromycin, 15 µg/mL). Resistance was  
579 defined according to CLSI (2017) with slight modifications<sup>8,9</sup>.

### 580 **Metal susceptibility testing**

581 The antibacterial effect of heavy metals was evaluated *in vitro* for the isolated pathogens  
582 using both agar well diffusion and tube dilution methods<sup>1,22</sup>. Five heavy metals such as  
583 copper (Cu), zinc (Zn), chromium (Cr), nickel (Ni), and cobalt (Co) were used as salts:  
584 CuSO<sub>4</sub>.5H<sub>2</sub>O, ZnSO<sub>4</sub>.7H<sub>2</sub>O, K<sub>2</sub>Cr<sub>2</sub>O<sub>7</sub>, NiCl<sub>2</sub>, and CoCl<sub>2</sub>.6H<sub>2</sub>O, respectively to study the  
585 level of zone of inhibition (ZOI). Briefly, pure culture of the isolated pathogens from NA  
586 plates were sub-cultured into Mueller-Hinton agar (Oxoid<sup>TM</sup>, UK) plates, and five 7 mm  
587 wells were made, one in the center of the plate and the other four about 20 mm away from the  
588 center. Varying concentrations of the metal solutions were prepared (2, 4, 8, 16, 32, 48 and  
589 64 µg/mL) and 100µl of prepared solution was inoculated into the central well of 1 cm in  
590 diameter. The plates were incubated at 37 °C for 24 h to allow diffusion of the metal into the  
591 agar, and the antibacterial activity was determined by measuring the diameter of ZOI in  
592 mm<sup>12</sup>. After investigating the resistance profile of the isolates at different concentrations, the  
593 minimal inhibitory concentration (MIC) of the metals was determined by the tube dilution  
594 method by gradually increasing or decreasing the heavy metal concentrations<sup>1</sup>. Finally,  
595 growth of bacterial colonies was observed and the concentration that showed no growth was  
596 considered as the minimum bactericidal concentration (MBC)<sup>1</sup>.

### 597 **Biofilm assay and microscopy**

598 Microtiter plate assays were performed to screen for biofilm formation (BF) ability of 80  
599 randomly selected isolates using standard protocols<sup>22,23,38,39</sup>. We quantified the absorbance of



600 solubilized crystal violet (CV), in a plate reader at 600 nm using 30% acetic acid in water as  
601 the blank and TSB as negative control. The solution was removed, and the absorbance  
602 measured at optical density-590 (OD590) ( $n = 3$ ). To determine BF ability of strains, cut-off  
603 OD (ODc) was defined as three standard deviations above the mean OD of the negative  
604 control. Strains were classified as: non-biofilm formers, NBF ( $OD \leq ODc$ ); weak biofilm  
605 formers, WBF ( $ODc < OD \leq 2 \times ODc$ ); moderate biofilm formers, MBF ( $2 \times ODc < OD \leq 4$   
606  $\times ODc$ ) and strong biofilm formers, SBF ( $OD > 4 \times ODc$ )<sup>22,39</sup>. In this study, the ODc value  
607 was set as 0.045 and the mean OD of the negative control was  $0.039 \pm 0.002$ <sup>22</sup>. The biofilms  
608 were then visualized using 5% TSB as nutrient rich media and FilmTracer™ LIVE/DEAD®  
609 Biofilm Viability Kit as staining materials under Olympus BX51 upright microscope at 40X  
610 objective, and finally images were collected using Olympus DP73 camera through cellSens  
611 entry software (Olympus Corporation, Japan) and visualized using image J software<sup>39</sup>. As a  
612 negative control, we used *E. coli* DH5 alpha for all the *in vitro* resistome (antimicrobial and  
613 metal susceptibility tests and biofilm assays) analysis tests.

#### 614 **Microbial functional analysis**

615 Metagenomic functional composition was based on the gene families from different levels of  
616 SEED module and the Kyoto Encyclopedia of Genes and Genomes (KEGG) database<sup>66</sup> using  
617 the MG-RAST 4.1 (MR) pipeline<sup>52</sup>. We observed significant differences (Kruskal–Wallis  
618 test,  $p=0.001$ ) in the relative abundance of genes coding for RATC and microbial functional  
619 genomic potentials in four cattle breeds.

#### 620 **Statistical analysis**

621 The characteristics of breeds of the cows with CM were compared using a Kruskal–Wallis  
622 test for quantitative variables<sup>2</sup>. The Shapiro-Wilk test was used to check normality of the  
623 data, and the non-parametric test Kruskal-Wallis rank sum test was used to evaluate  
624 differences in the relative abundance of bacterial taxa at strain level according to breed

625 groups<sup>12,15,16</sup>. The statistical analyses for the MR data were initially performed by embedded  
626 calls to statistical tests in the pipeline and validated further using IBM SPSS (SPSS, Version  
627 23.0, IBM Corp., NY USA) using the above mentioned tests. For the functional abundance  
628 profiling, the statistical (Kruskal–Wallis test and Pearson correlation) tests were applied at  
629 different KEGG and SEED subsystem levels in the MR pipeline<sup>52</sup>. To evaluate the significant  
630 relationships between identified bacterial species and the study region, we used the two-  
631 sample proportions test using SPSS. Results were considered statistically significant when  
632  $p < 0.05$  and highly significant when  $p < 0.01$ . Mean values were used to compare the  
633 antimicrobial efficacy results of the tested antibiotics and heavy metals at varying  
634 concentrations. Standard error means were calculated to analyze the distributions of the data  
635 from the mean value and confidence intervals of 95% were calculated for the MIC and MBC  
636 tests results to plot error bars<sup>22,39</sup>. We also performed Pearson correlation tests to test for  
637 relationships between taxonomic abundance of the pathogens and antimicrobial resistance  
638 both for cultural and metagenomic data. A post hoc Bonferroni test was used to compare the  
639 biofilm OD600 mean values<sup>22,39</sup>.

#### 640 **Acknowledgements**

641 The authors thank Stephanie Warnken, PhD student at the Computational Biology Institute,  
642 Milken Institute School of Public Health, The George Washington University, USA for their  
643 technical support in learning basic bioinformatics operations. We also acknowledge the  
644 cooperation of the dairy farmers for allowing us to conduct the study in their farms.

#### 645 **Author contributions**

646 M.N.H., M. S., A.I. and M.A.H. conceived and designed the overall study. M.N.H. surveyed  
647 and collected all the field samples. M.N.H., R.A.C., K.M.G, O.S. and O.K.I. carried out  
648 laboratory works including DNA extractions and sequencing, microbiological (cultural,  
649 biochemical) examinations, antimicrobial (antibiotics, metals) sensitivity tests and biofilm

650 assays. M.A.H. and K.A.C. contributed chemicals and reagents. M.N.H. and A.I. conceived,  
651 designed and executed the bioinformatics analysis. M.N.H. interpreted the results and drafted  
652 the manuscript. M.S., K.A.C. and M.A.H contributed intellectually to the interpretation and  
653 presentation of the results. Finally, all authors have approved the manuscript for submission.

654

### 655 **Funding**

656 The Bangladesh Bureau of Educational Information and Statistics (BANBEIS), Ministry of  
657 Education, Government of the People's Republic of Bangladesh (Grant No. LS2017313)  
658 supported this work.

### 659 **Supplementary Information**

660 Supplementary information supporting the findings of the study are available in this article as  
661 Supplementary Data files, or from the corresponding author on request.

### 662 **Conflict of Interest Statement**

663 The authors declare no competing interests.

### 664 **Data availability**

665 The sequence data reported in this paper have been deposited in the NCBI database  
666 (BioProject PRJNA529353 for metagenome sequences, NCBI accession number: MN  
667 620423-MN 620430 for 16S rRNA gene sequences) and are available from the corresponding  
668 author upon reasonable request.

669

670

671

672

673

674

675 **References**

- 676 1. Reyes-Jara, A., Cordero, N., Aguirre, J., Troncoso, M. & Figueroa, G. Antibacterial  
677 Effect of Copper on Microorganisms Isolated from Bovine Mastitis. *Front. Microbiol.*  
678 **7**, 626 (2016).
- 679 2. Hoque, M. N. et al. Metagenomic deep sequencing reveals association of microbiome  
680 signature with functional biases in bovine mastitis. *Sci. Rep.* **9**,13536 (2019).
- 681 3. Oikonomou, G. et al. Microbiota of cow's milk; distinguishing healthy, subclinically  
682 and clinically diseased quarters. *PLoS One* **9(1)**, e85904 (2014).
- 683 4. Falentin, H. et al. Bovine Teat Microbiome Analysis Revealed Reduced Alpha  
684 Diversity and Significant Changes in Taxonomic Profiles in Quarters with a History  
685 of Mastitis. *Front. Microbiol.* **7** (2016).
- 686 5. Abebe, R., Hatiya, H., Abera, M., Megersa, B. & Asmare, K. Bovine mastitis:  
687 prevalence, risk factors and isolation of *Staphylococcus aureus* in dairy herds at  
688 Hawassa milk shed, South Ethiopia. *BMC Vet. Res.* **12(1)**, 270 (2016).
- 689 6. Hoque, M. N. et al. Molecular characterization of *Staphylococcus aureus* strains in  
690 bovine mastitis milk in Bangladesh. *Int. J. Vet. Sci. Med.* **6(1)**, 53-60 (2018).
- 691 7. Gao, J. et al. Incidence of clinical mastitis and distribution of pathogens on large  
692 Chinese dairy farms *J. Dairy Sci.* **100(6)**, 4797-4806 (2017).
- 693 8. Cheng, J. et al. Antimicrobial resistance profiles of 5 common bovine mastitis  
694 pathogens in large Chinese dairy herds. *J. Dairy Sci.* **102**, 1-11 (2018).
- 695 9. Preethirani, P. L. et al. Isolation, biochemical and molecular identification, and *in-*  
696 *vitro* antimicrobial resistance patterns of bacteria isolated from bubaline subclinical  
697 mastitis in South India. *PLoS One* **10(11)**, e0142717 (2015).
- 698 10. Van Boeckel, T. P. *et al.* Global trends in antimicrobial use in food animals. *Proc.*  
699 *Nat. Aca. Sci.* **112**, 5649–5654 (2015).

- 700 11. Baron, S., Diene, S. & Rolain, J. M. Human microbiomes and antibiotic resistance.  
701 *Human Microbiome J.* **10**, 43-52 (2018).
- 702 12. Cremonesi, P. et al. Milk microbiome diversity and bacterial group prevalence in a  
703 comparison between healthy Holstein Friesian and Rendena cows. *PLoS One* **13(10)**,  
704 e0205054 (2018).
- 705 13. Oniciuc, E. et al. The present and future of Whole Genome Sequencing (WGS) and  
706 Whole Metagenome Sequencing (WMS) for surveillance of antimicrobial resistant  
707 microorganisms and antimicrobial resistance genes across the food chain. *Genes* **9(5)**,  
708 268 (2018).
- 709 14. Seth, S., Välimäki, N., Kaski, S. & Honkela, A. Exploration and retrieval of whole-  
710 metagenome sequencing samples. *Bioinformatics* **30(17)**, 2471-2479 (2014).
- 711 15. Curone, G. et al. What we have lost: Mastitis resistance in Holstein Friesians and in a  
712 local cattle breed. *Res. Vet. Sci.* **116**, 88-98 (2018).
- 713 16. Gonzalez-Recio, O., Zubiria, I., García-Rodríguez, A., Hurtado, A. & Atxaerandio, R.  
714 Signs of host genetic regulation in the microbiome composition in 2 dairy breeds:  
715 Holstein and Brown Swiss. *J. Dairy Sci.* **101(3)**, 2285-2292 (2018).
- 716 17. Brandt, C. et al. *In silico* serine  $\beta$ -lactamases analysis reveals a huge potential  
717 resistome in environmental and pathogenic species. *Sci. Rep.* **7**, 43232 (2017).
- 718 18. D'Costa, V. M. *et al.* Antibiotic resistance is ancient. *Nature* **477**, 457-461 (2011).
- 719 19. Weller, C. & Wu, M. A generation-time effect on the rate of molecular evolution in  
720 bacteria. *Evolution* **69**, 643-652 (2015).
- 721 20. Zaheer, R. et al. Comparative diversity of microbiomes and Resistomes in beef  
722 feedlots, downstream environments and urban sewage influent. *BMC Microbiol.*  
723 **19**,197 (2019).

- 724 21. Tomazi, T. et al. Molecular characterization and antimicrobial susceptibility pattern of  
725 *Streptococcus agalactiae* isolated from clinical mastitis in dairy cattle. *PLoS One*  
726 **13(6)**, e0199561 (2018).
- 727 22. Vaidya, M. Y. et al. Antimicrobial efficacy and synergy of metal ions against  
728 *Enterococcus faecium*, *Klebsiella pneumoniae* and *Acinetobacter baumannii* in  
729 planktonic and biofilm phenotypes. *Sci. Rep.* **7(1)**, 5911 (2017).
- 730 23. Singh, S., Singh, S. K., Chowdhury, I. & Singh, R. Understanding the mechanism of  
731 bacterial biofilms resistance to antimicrobial agents. *The Open Microbiol. J.* **11**, 53  
732 (2017).
- 733 24. Patel, S. H. et al. Culture independent assessment of human milk microbial  
734 community in lactational mastitis. *Sci. Rep.* **7(1)**, 7804 (2017).
- 735 25. Thompson-Crispi, K., Atalla, H., Miglior, F. & Mallard, B. A. Bovine mastitis:  
736 Frontiers in immunogenetics. *Front. Immunol.* **5**, 493 (2014).
- 737 26. Li, F. et al. Host genetics influence the rumen microbiota and heritable rumen  
738 microbial features associate with feed efficiency in cattle. *Microbiome* **7(1)**, 92  
739 (2019).
- 740 27. Sumon, S. M. M. R., Ehsan, M. A. & Islam, M. T. Subclinical mastitis in dairy  
741 cows: Somatic cell counts and associated bacteria in Mymensingh, Bangladesh. *J.*  
742 *Bangladesh Agri. Uni.* **15(2)**, 266-271 (2017).
- 743 28. Naushad, S. et al. Comprehensive phylogenetic analysis of bovine non-aureus  
744 staphylococci species based on whole-genome sequencing. *Front. Microbiol.* **7**, 1990  
745 (2016).
- 746 29. Penders, J., Stobberingh, E., Savelkoul, P. & Wolffs, P. The human microbiome as a  
747 reservoir of antimicrobial resistance. *Front. Microbiol.* **4**, 87 (2013).

- 748 30. Kumar, S. & Varela, M. F. Biochemistry of bacterial multidrug efflux pumps. *Int. J.*  
749 *Mol. Sci.* **13(4)**, 4484-4495 (2012).
- 750 31. Tiwari, S. et al. Two-Component Signal Transduction Systems of Pathogenic Bacteria  
751 As Targets for Antimicrobial Therapy: An Overview. *Front. Microbiol.* **8**, 1878  
752 (2017).
- 753 32. Li, X. Z. & Nikaido, H. Efflux-mediated drug resistance in bacteria: An  
754 update. *Drugs* **69**,1555-1623 (2009).
- 755 33. Yao, H. et al. Emergence of a potent multidrug efflux pump variant that enhances  
756 *Campylobacter* resistance to multiple antibiotics. *mBio* **7(5)**, e01543-16 (2016).
- 757 34. Drewniak, L. et al. Physiological and metagenomic analyses of microbial mats  
758 involved in self-purification of mine waters contaminated with heavy metals. *Front.*  
759 *Microbiol.* **7**, 1252 (2016).
- 760 35. Hu, Y., Yang, X., Lu, N. & Zhu, B. The abundance of antibiotic resistance genes in  
761 human guts has correlation to the consumption of antibiotics in animal. *Gut Microbes*  
762 **5(2)**, 245-249 (2014).
- 763 36. Ciesinski, L. et al. High dietary zinc feeding promotes persistence of multi-resistant *E.*  
764 *coli* in the swine gut. *PLoS One* **13(1)**, e0191660 (2018).
- 765 37. Murcia, R. et al. Development of antibacterial and antifungal triazole chromium (III)  
766 and cobalt (II) complexes: synthesis and biological activity evaluations. *Molecules*  
767 **23(8)**, 2013 (2018).
- 768 38. Melchior, M.B., Vaarkamp, H. & Fink-Gremmels, J. Biofilms: a role in recurrent  
769 mastitis infections? *Vet. J.* **171(3)**, 398-407 (2006).
- 770 39. Schönborn, S. et al. *In vitro* ability of mastitis causing pathogens to form biofilms. *J.*  
771 *Dairy Res.* **84(2)**, 198-201 (2017).

- 772 40. Gomes, F, Saavedra, M. J. & Henriques, M. Bovine mastitis disease/pathogenicity:  
773 evidence of the potential role of microbial biofilms. *Patho. Dis.* **74(3)**, 1-7 (2016).
- 774 41. Duan, Q., Zhou, M., Zhu, L. & Zhu, G. Flagella and bacterial pathogenicity. *J. Basic*  
775 *Microbiol.* **53(1)**, 1-8 (2013).
- 776 42. Zatakia, H. M., Arapov, T. D., Meier, V. M. & Scharf, B. E. Cellular stoichiometry of  
777 methyl-accepting chemotaxis proteins in *Sinorhizobium meliloti*. *J. Bacteriol.* **200(6)**,  
778 e00614-17 (2018).
- 779 43. Matilla, M. A. & Krell, T. The effect of bacterial chemotaxis on host infection and  
780 pathogenicity. *FEMS Microbiol. Reviews* **42(1)**, fux052 (2017).
- 781 44. Dons, L. et al. Role of flagellin and the two-component CheA/CheY system of  
782 *Listeria monocytogenes* in host cell invasion and virulence. *Infection Immunity*, **72(6)**,  
783 3237-3244 (2004).
- 784 45. Zere, T. R. et al. Genomic Targets and Features of BarA-UvrY (-SirA) Signal  
785 Transduction Systems. *PLoS One* **10(12)**, e0145035 (2015).
- 786 46. Hirai, K. E. et al. Endoplasmic Reticulum Stress Markers and Their Possible  
787 Implications in Leprosy's Pathogenesis. *Dis. Markers*, 2018.
- 788 47. Andrei, S., Matei, S., Rugină, D., Bogdan, L. & Ștefănuț, C. Interrelationships  
789 between the content of oxidative markers, antioxidative status, and somatic cell count  
790 in cow's milk. *Czech J. Animal Sci.*, **61(9)**, 407-413 (2016).
- 791 48. Darbaz, I. et al. Evaluation of milk glutathione peroxidase and superoxide dismutase  
792 levels in subclinical mastitis in Damascus goats. *Turk. J. Vet. Anim. Sci.* **43(2)**, 259-  
793 263 (2019).
- 794 49. Hoque, M. N. et al. Different screening tests and milk somatic cell count for the  
795 prevalence of subclinical bovine mastitis in Bangladesh. *Trop. Anim. Health Prod.*  
796 **47(1)**, 79-86 (2015).



- 797 50. Head, S. R. et al. Library construction for next-generation sequencing: overviews and  
798 challenges. *Biotechniques* **56(2)**, 61-77 (2014).
- 799 51. Hong, C. et al. PathoScope 2.0: a complete computational framework for strain  
800 identification in environmental or clinical sequencing samples. *Microbiome* **2(1)**,  
801 33(2014).
- 802 52. Glass, E. M., Wilkening, J., Wilke, A., Antonopoulos, D. & Meyer, F. Using the  
803 metagenomics RAST server (MG-RAST) for analyzing shotgun metagenomes. *Cold*  
804 *Spring Harbor Protocols* **2010(1)**, 5368 (2010).
- 805 53. Langmead, B., & Salzberg, S. L. (2012). Fast gapped-read alignment with Bowtie 2.  
806 *Nat. Methods* **9**, 357–359 (2012).
- 807 54. Francis, O. E. et al. Pathoscope: species identification and strain attribution with  
808 unassembled sequencing data. *Genome Res.* **23(10)**, 1721-1729 (2013).
- 809 55. Koh, H. An adaptive microbiome  $\alpha$ -diversity-based association analysis method. *Sci.*  
810 *Rep.* **8(1)**, 18026 (2018).
- 811 56. McMurdie, P. J. & Susan, H. Phyloseq: an R package for reproducible interactive  
812 analysis and graphics of microbiome census data. *PLoS One* **8(4)**, e61217 (2013).
- 813 57. Beck, J., Holloway, J. D. & Schwanghart, W. Under sampling and the measurement  
814 of beta diversity. *Methods Ecol. Evol.* **4(4)**, 370-382 (2013).
- 815 58. Hu. Y. et al. OmicCircos: a simple-to-use R package for the circular visualization of  
816 multidimensional omics data. *Cancer Informatics* **13**,13–20 (2014).
- 817 59. Queipo-Ortuño, M. I. et al. Preparation of bacterial DNA template by boiling and  
818 effect of immunoglobulin G as an inhibitor in real-time PCR for serum samples from  
819 patients with brucellosis. *Clin. Vaccine Immunol.* **15(2)**, 293-296 (2008).

- 820 60. Masomian, M., Rahman, R. N. Z. R. A., Salleh, A. B. & Basri, M. Analysis of  
821 comparative sequence and genomic data to verify phylogenetic relationship and  
822 explore a new subfamily of bacterial lipases. *PLoS One* **11(3)**, e0149851 (2016).
- 823 61. Larkin M. A. et al. Clustal W and Clustal X version 2.0. *Bioinformatics* **23**, 2947–  
824 2948 (2007).
- 825 62. Letunic, I. & Bork, P. Interactive Tree Of Life<sup>2</sup>: online annotation and display of  
826 phylogenetic trees made easy. *Nucleic Acids Res.* **39**, W475–W478 (2011).
- 827 63. Kumar, S., Stecher, G. & Tamura, K. MEGA7: Molecular Evolutionary Genetics  
828 Analysis version 7.0 for bigger datasets. *Mol. Biol. Evol.* **33(7)**, 1870–1874 (2016).
- 829 64. Pattengale, N.D., Alipour, M., Bininda-Emonds, O.R., Moret, B.M. & Stamatakis, A.  
830 How many bootstrap replicates are necessary? *J. Comput. Biol.* **17(3)**, 337–354  
831 (2010).
- 832 65. CLSI. Performance standards for antimicrobial susceptibility testing; CLSI document  
833 M100–S27. Clinical Laboratory Standards Institute (CLSI), Wayne, PA (2017).
- 834 66. Kanehisa, M., Sato, Y., Furumichi, M., Morishima, K. & Tanabe, M. New approach  
835 for understanding genome variations in KEGG. *Nucleic Acids Res.* **47(D1)**, D590–  
836 D595 (2018).
- 837
- 838

## Resistome diversity in bovine clinical mastitis microbiome, a signature concurrence

M. Nazmul Hoque, Arif Istiaq, Rebecca A. Clement, Keylie M. Gibson, Otun Saha, Ovinu Kibria Islam, Ruhshan Ahmed Abir, Munawar Sultana, AMAM Zonaed Siddiki, Keith A. Crandall, M. Anwar Hossain

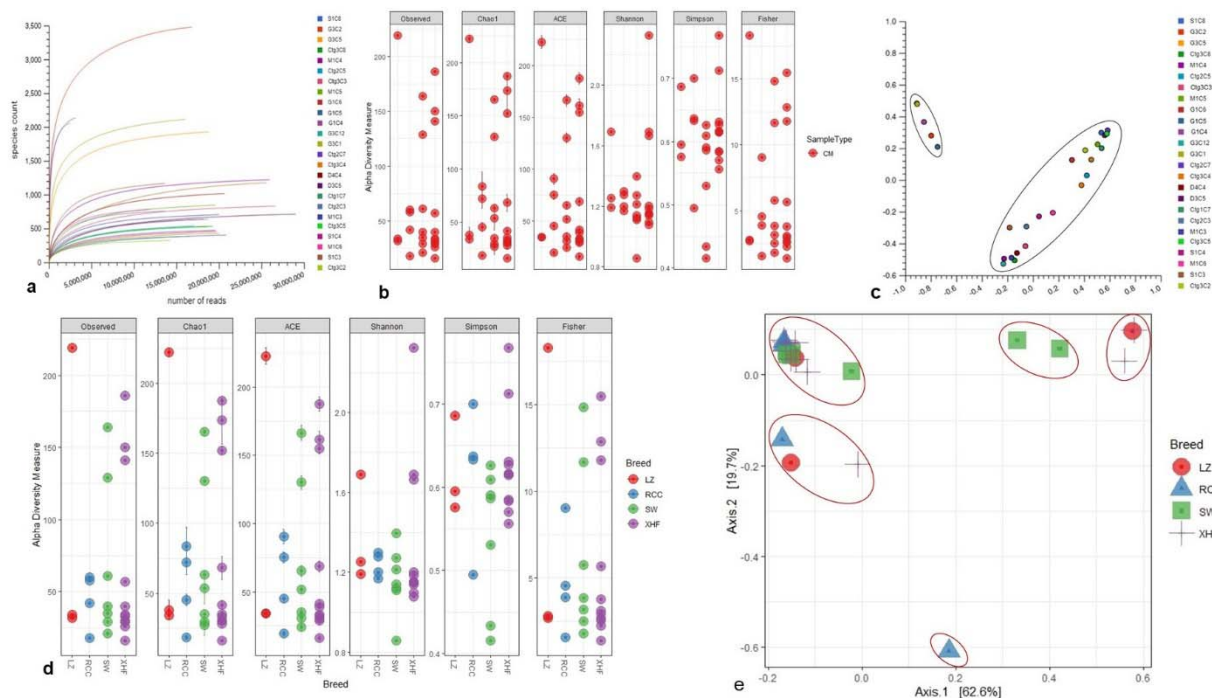

**Fig. 1** Bovine clinical mastitis (CM) milk microbiome diversity. **a)** Rarefaction curves showing the influence of sequencing depth (number of reads per sample, X axis) on species richness (Y axis) in CM milk samples. The rarefaction curves representing the number of species per sample indicated that the sequencing depth was sufficient enough to fully capture the microbial diversity as existed. **b)** Alpha diversity measured using the observed species, Chao 1, ACE and Shannon diversity indices through PathoScope (PS) analysis. The observed species richness ( $P_{\text{Observed}} = 0.511$ ), Chao1 ( $P_{\text{Chao1}} = 0.081$ ), ACE ( $P_{\text{ACE}} = 0.121$ ), Shannon ( $P_{\text{Shannon}} = 0.401$ ), Simpson ( $P_{\text{Simpson}} = 0.011$ ) and Fisher ( $P_{\text{Fisher}} = 0.014$ ) diversity analyses revealed that microbiome diversity did not vary among the CM samples. **c)** Beta diversity (Principal coordinate analysis; PCoA) measured on the Bray-Curtis distance method using MG-RAST tool for CM causing

microbial communities (genus-level) shows that most of the CM samples clustered together (black circle) indicating no significant diversity differences. **d)** Alpha diversity measured using species richness ( $P_{\text{Observed}} = 0.011$ ), Chao1 ( $P_{\text{Chao1}} = 0.001$ ), ACE ( $P_{\text{ACE}} = 0.021$ ), Shannon ( $P_{\text{Shannon}} = 0.001$ ), Simpson ( $P_{\text{Simpson}} = 0.009$ ) and Fisher ( $P_{\text{Fisher}} = 0.023$ ) diversity matrices on PS data showed significant diversity differences (Kruskal–Wallis test,  $p=0.002$ ) within the microbial communities of four breeds (Local Zebu cows, LZ; Red Chattogram cows, RCC; Sahiwal, SW; Holstein Friesian cross, XHF) of cows. **e)** PCoA plot based on weighted-UniFrac distance method at strain-level microbiome signature of four breeds of cows reveals that the CM samples appear more distantly (red circles) indicating significant group differences ( $p=0.001$ ). This differences in the microbiome signature associated with CM in four breeds could be explained by a large percentage of variation in the first (62.6%) and second (19.7%) axes.

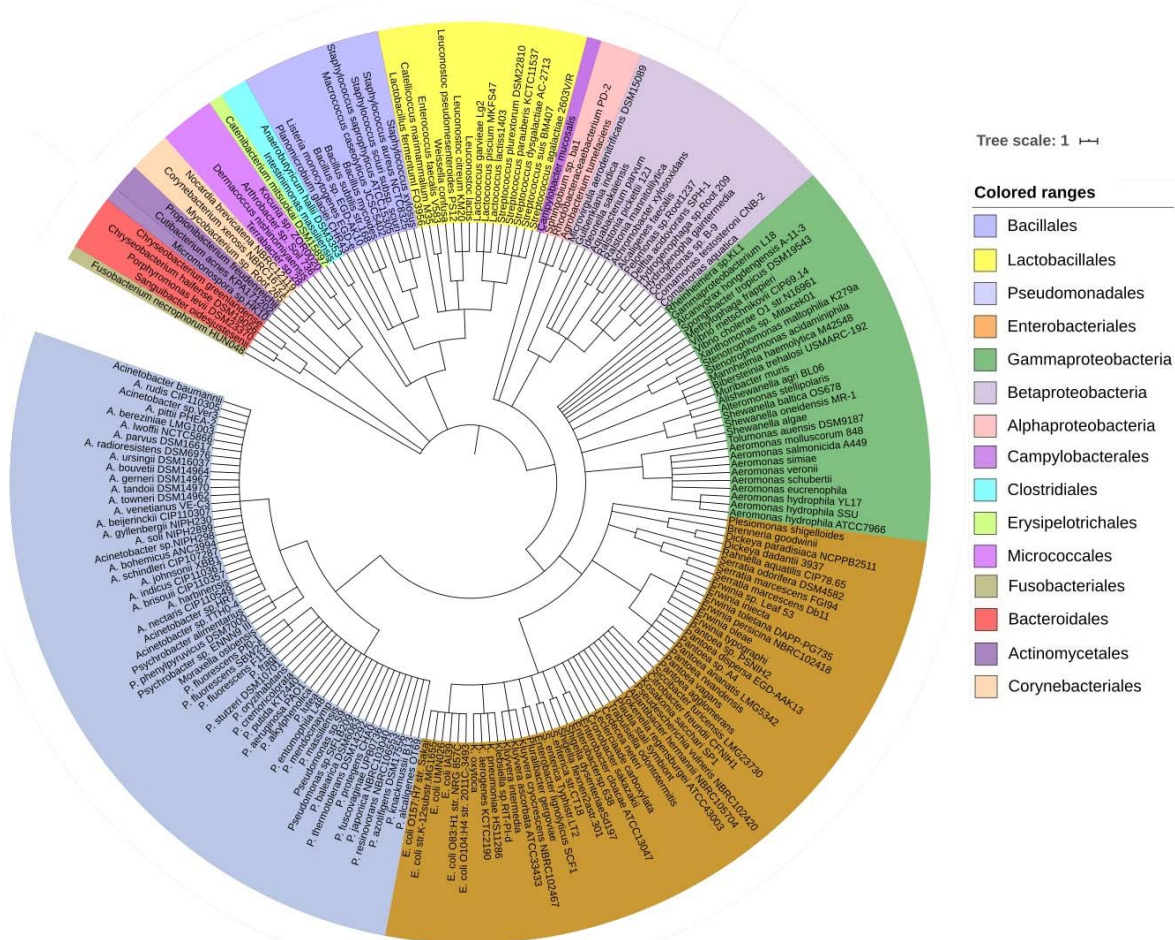

**Fig. 2** The strain-level taxonomic profile microbiota associated with bovine clinical mastitis (CM). Taxonomic dendrogram showing the top bacterial microbiome of bovine CM milk. Color ranges identify different strains within the tree. Taxonomic dendrogram was generated with the top 200 abundant unique strains of bacteria in CM milk metagenome based on the maximum likelihood method in Clustal W and displayed with iTOL (interactive Tree Of Life). Each node represents a single strain shared among more than 50 % of the samples at a relative abundance of >0.0006% of the total bacterial community. The inner circle represents the root of the microbiome defined as bacteria present in 25 CM milk samples. The outer circle shows the strains and/or species colored by different order of bacteria present in >80% of samples. The strains in the phylogenetic tree are also available in Supplementary Data 1.



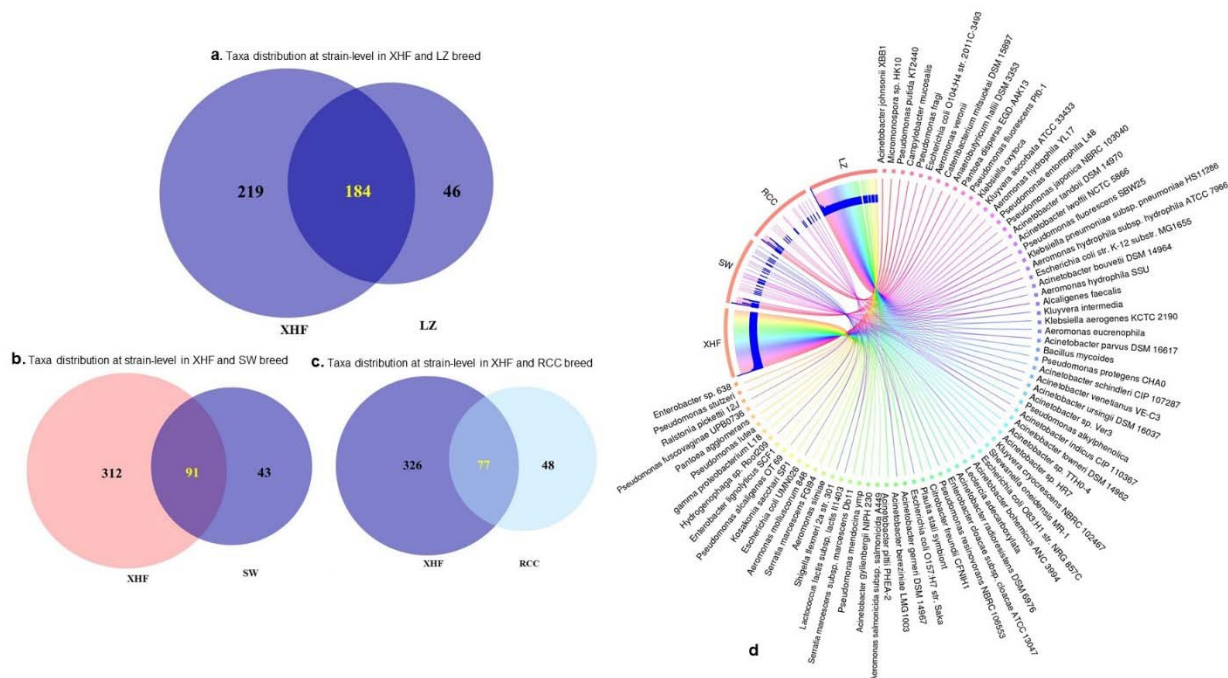

**Fig. 3** Strain-level bovine CM microbiome diversity in four different breeds (Local Zebu, LZ; Red Chattogram Cattle, RCC; Sahiwal, SW; Crossbred Holstein Friesian, XHF) of cows through PathoScope (PS) analysis. **a)** Venn diagrams representing the core unique and shared microbiomes of bovine clinical mastitis (CM) in XHF and LZ breeds while **b)** and **c)** Venn diagrams showing the unique and shared bacterial strains in XHF and SW and XHF and RCC breeds, respectively. Microbiome sharing between the conditions are indicated by yellow color. **d)** The circular plot illustrates the relative abundance of the top 75 CM causing bacterial strains in CM milk samples obtained from XHF, LZ, SW and RCC dairy breeds. Taxa in the respective breed of cows are represented by different colored ribbons, and the inner blue bars indicate their respective relative abundances. The XHF cows had the highest number of microbial strains followed by LZ, SW and RCC. This breed specific association revealed that 45.66, 22.58 and 19.11% of the detected bacterial strains in CM milk collected from LZ, SW and RCC cows, respectively, were also seen in the CM milk microbiome of XHF cows. The relative abundance bacterial strains in four breeds is also available in Supplementary Data 1.

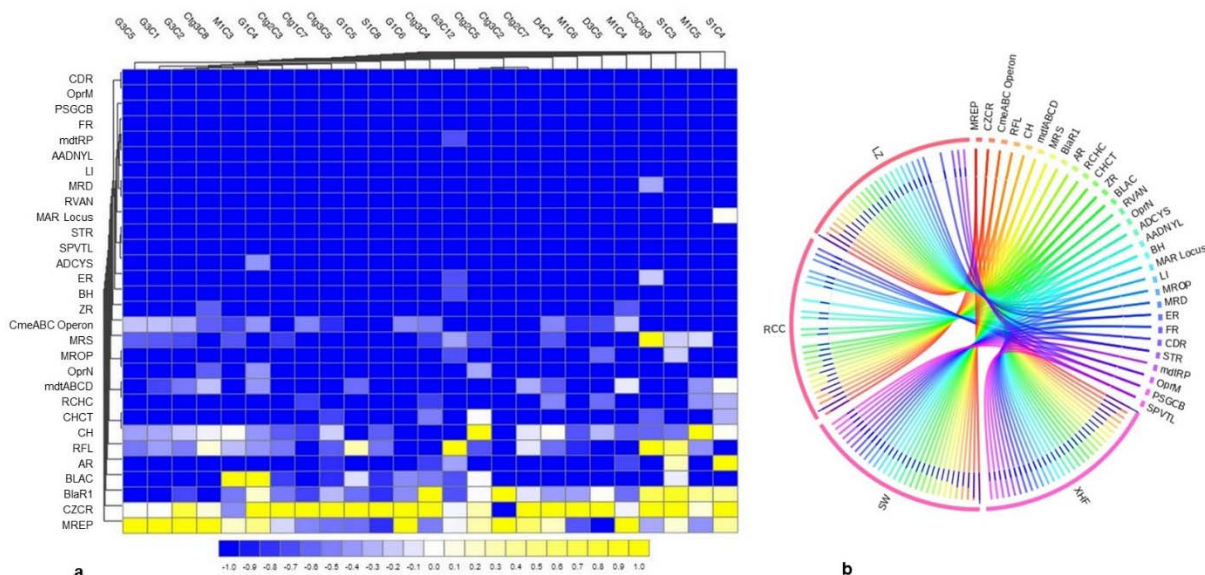

**Fig. 4** Projection of the resistance to antibiotic and toxic compounds (RATC) genes in bovine clinical mastitis (CM) pathogens. **a)** Heatmap showing the hierarchical clustering of 30 different RATC genes detected in CM associated microbiomes of 25 CM milk samples as measured at level-3 of SEED subsystems in MG-RAST pipeline. The relative abundance of these genes significantly correlated (Pearson correlation,  $p=0.002$ ) with the relative abundance of the bacterial taxa found in these samples. The color bar at the bottom represents the relative abundance of putative genes and expressed as a value between -1 (low abundance) and 1 (high abundance). The yellow color indicates the more abundant patterns, while blue cells for less abundant RATC gene in that particular sample. **b)** The circular plot illustrates the diversity and relative abundance of the RATC genes detected among the microbiomes of the four different breeds (Local Zebu, LZ; Red Chattogram Cattle, RCC; Sahiwal, SW; Crossbred Holstein Friesian, XHF) of cows through SEED subsystems analysis. We found no significant correlation between the resistome and microbiome diversity in different breeds ( $p=0.692$ ). The association of the RATC genes according to breeds is shown by different colored ribbons and the relative

abundances these genes are represented by inner blue colored bars. Part of the RATC functional groups are shared among microbes of the four breeds (XHF, LZ, SW and RCC), and some are effectively undetected in the microbiomes of the other breeds. Abbreviations: MREP, multidrug resistance efflux pumps; CZCR, cobalt-zinc-cadmium resistance; BlaR, BlaR1 family regulatory sensor-transducer disambiguation; BLAC, beta-lactamase resistance; AR, arsenic resistance; RFL, resistance to fluoroquinolones; CH, copper homeostasis; CHCT, copper homeostasis: copper tolerance; RCHC, resistance to chromium compounds; mdtABCD, the mdtABCD multidrug resistance cluster; OprN, mexe-mexf-oprn multidrug efflux system; MROP, mercury resistance to operon; MRS, methicillin resistance in *Staphylococci*; CmeABC Operon, multidrug efflux pump in *Campylobacter jejuni*; ZR, zinc resistance; BH, bile hydrolysis; ER, erythromycin resistance; ADCYS, adaptation to d-cysteine; SPVTL, *Streptococcus pneumoniae* vancomycin tolerance locus; STR, Streptothricin resistance; MAR Locus, multiple antibiotic resistance to locus; RVAN, resistance to vancomycin; MRD, mercuric reductase; LI, lysozyme inhibitors; AADNYL, aminoglycoside adenylyltransferases; mdtRP, multidrug resistance operon mdtRP of *Bacillus*; FR, Fosfomycin resistance; PSGCB, polymyxin synthetase gene cluster in *Bacillus*; OprM, mexA-mexB-oprm multidrug efflux system; CDR, cadmium resistance. Additional information is also available in Supplementary Data 2.



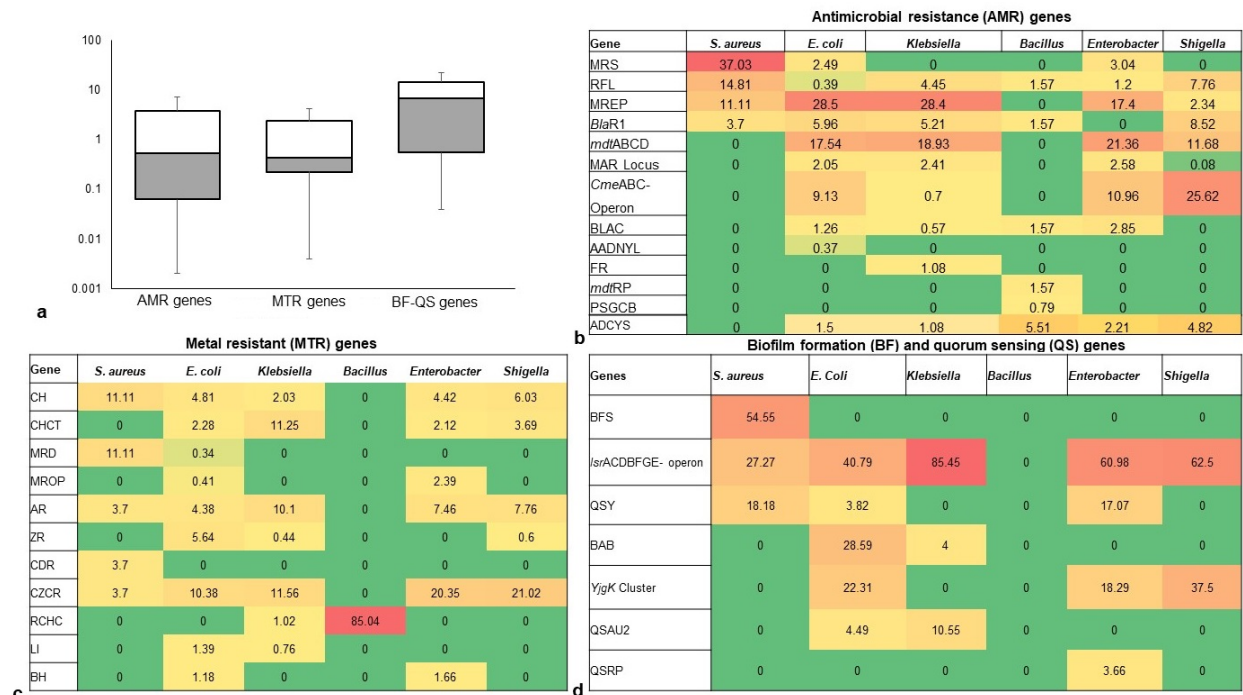

**Fig. 5** Heatmap comparison of antibiotics, metals, biofilm formation and quorum sensing genes found in the metagenome sequences (WMS) of six CM causing bacteria through SEED subsystems analysis in MG-RAST pipeline. **a**) Diversity and relative abundance of the antimicrobial resistance (AMR), metal resistance (MTR), and biofilm formation (BF) and quorum sensing (QS) genes varied significantly (Kruskal–Wallis test,  $p=0.029$ ) among the study bacteria. **b**) Relative abundance of AMR genes, **c**) Relative abundance of MTR genes **d**) Relative abundance of BF-QS genes. Values are colored in shades of green to yellow to red, indicating low (absent), medium and high abundance, respectively. Abbreviations: MRS, methicillin resistance in *Staphylococci*; RFL, resistance to fluoroquinolones; MREP, multidrug resistance to efflux pumps; *BlaR*, *BlaR1* family regulatory sensor-transducer disambiguation; *mdtABCD*, the *mdtABCD* multidrug resistance cluster; MAR Locus, multiple antibiotic resistance; *CmeABC* Operon, Multidrug efflux pump in *Campylobacter jejuni*; BLAC, beta-lactamase resistance; AADNYL, aminoglycoside adenyltransferases (Gentamycin resistance); FR, Fosfomycin resistance; *mdtRP*, multidrug resistance operon *mdtRP* of *Bacillus*; PSGCB, polymyxin

synthetase gene cluster in *Bacillus*; BFS, biofilm formation in *Staphylococcus*, lsrACDBFGE operon, autoinducer 2 (AI-2) transport and processing; QSY, quorum sensing in *Yersinia*; BAB, biofilm adhesion biosynthesis; YjgK cluster, protein YjgK cluster linked to biofilm formation; QSAU2, quorum sensing: autoinducer-2 synthesis; QSRP, quorum sensing regulation in *Pseudomonas*; CH, copper homeostasis; CHCT, copper homeostasis: copper tolerance; MRD, mercuric reductase; MROP, mercury resistance to operon; AR, arsenic resistance; ZR, zinc resistance; CDR, cadmium resistance; CZCR, cobalt-zinc-cadmium resistance; ADCYS, adaptation to d-cysteine; RCHC, resistance to chromium compounds; LI, lysozyme inhibitors; BH, bile hydrolysis. More details about these genes can be found in the text and Supplementary Data 2.

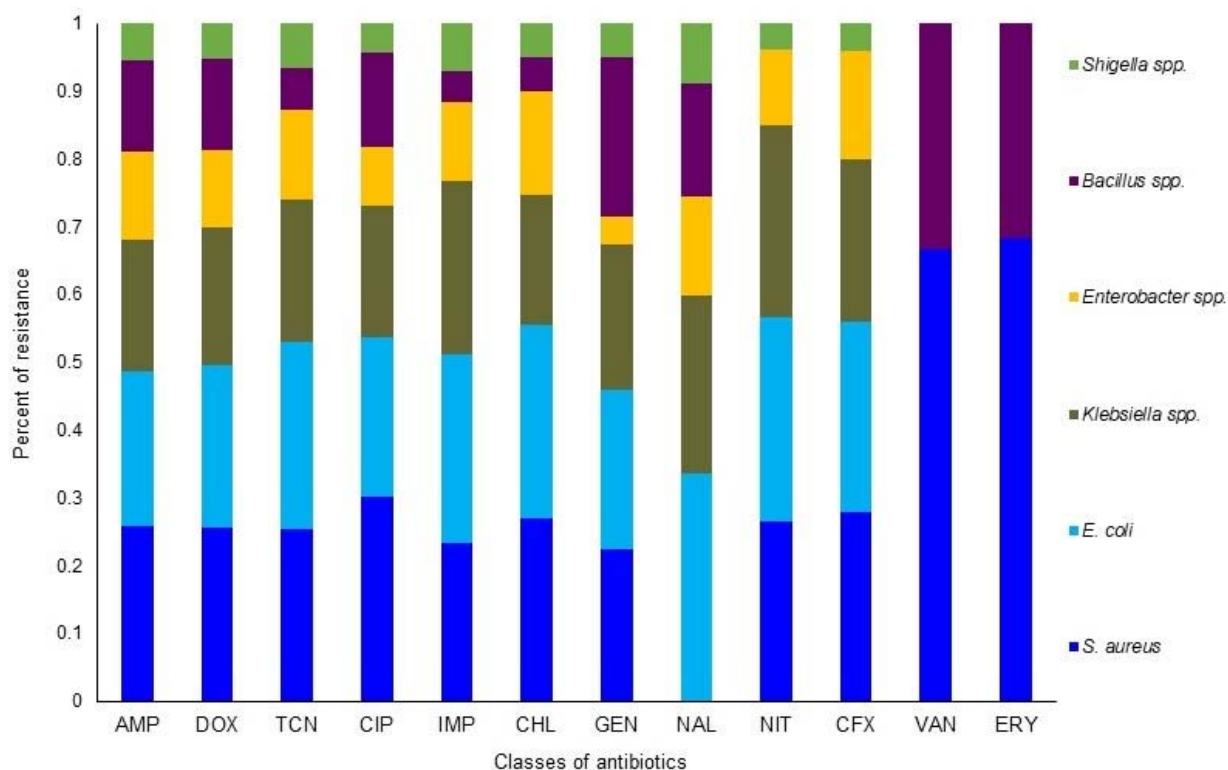

**Fig. 6** Antibiotic resistance pattern of bovine clinical mastitis pathogens by disk diffusion method. The antimicrobial resistance (AMR) patterns of the six bacteria obtained from 221 CM isolates (*S. aureus*, 56; *E. coli*, 54; *Klebsiella spp.*, 42; *Enterobacter spp.*, 26; *Bacillus spp.*, 31; *Shigella spp.*, 12) for twelve commonly used antibiotics from nine different groups/classes. Abbreviations: AMP, Ampicillin; DOX, Doxycycline; TCN, Tetracycline; CIP, Ciprofloxacin; IMP, Imipenem; CHL, Chloramphenicol; GEN, Gentamycin; NAL, Nalidixic acid; NIT, Nitrofurantoin; CFX, Cefoxitin; VAN, Vancomycin; ERY, Erythromycin. More details about AMR profiles can be found in the text and in Table 1.

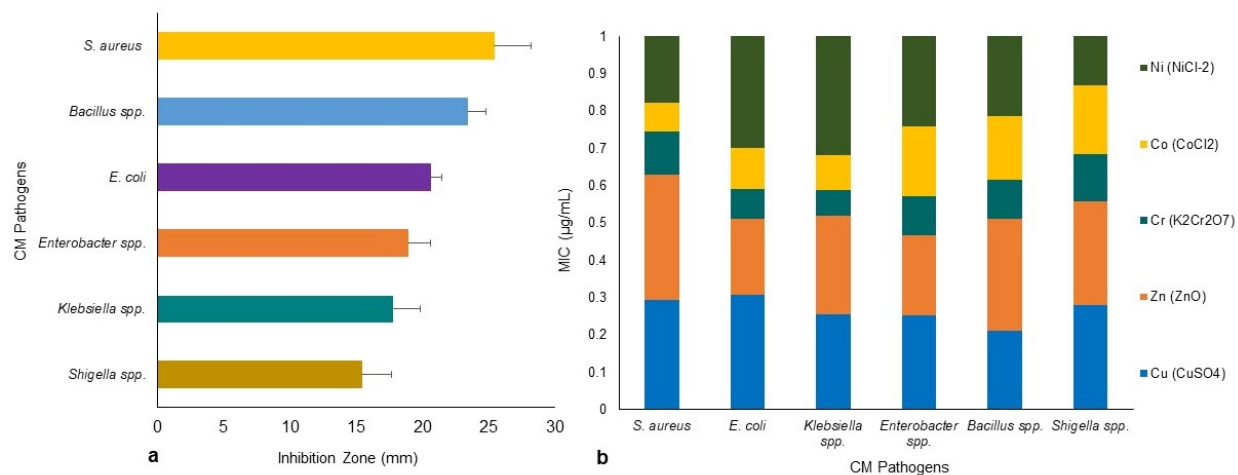

**Fig. 7** Antibacterial activity of heavy metals: Cu (CuSO<sub>4</sub>), Zn (ZnO), Cr (K<sub>2</sub>Cr<sub>2</sub>O<sub>7</sub>), Co (CoCl<sub>2</sub>) and Ni (NiCl<sub>2</sub>) against bovine CM pathogens. **a**) Zone of inhibition (ZOI, mm) for six CM causing bacteria, each bar representing the mean values (values given horizontal axis of the bars, mm) and standard deviation error bar (SD error bar) for each bacterium. **b**) Minimal inhibitory concentration (MIC) (expressed as µg/mL) of the tested metals against representative genera/species as determined by agar well diffusion and tube dilution methods.

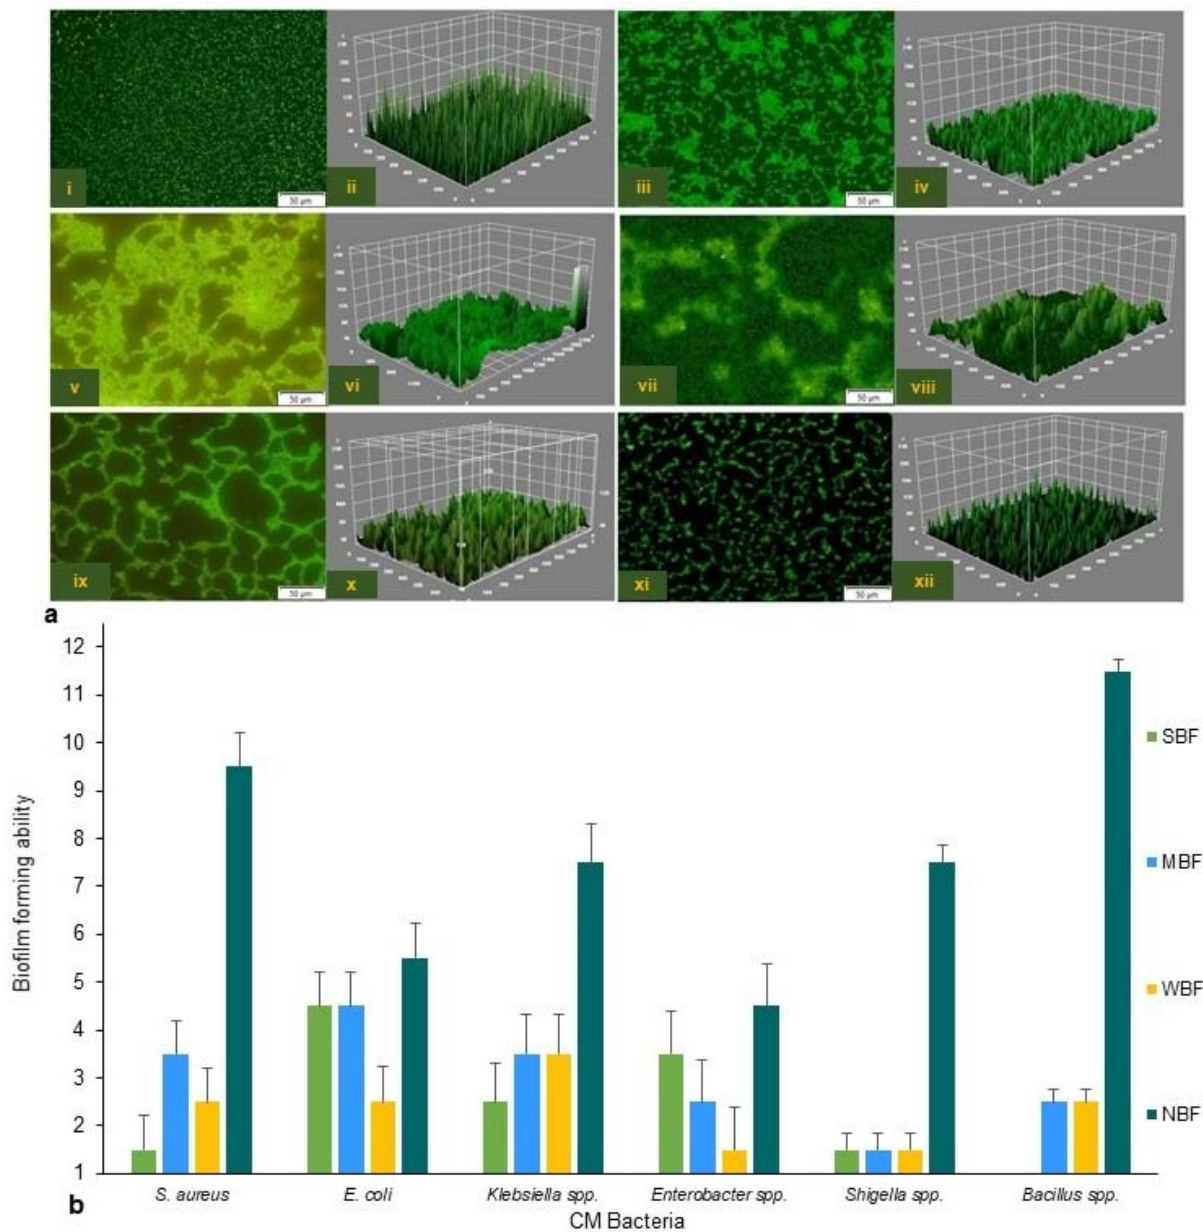

**Fig. 8** Biofilm formation (BF) ability of the six CM causing pathogens. BF assays was performed with solubilized crystal violet (CV) in a plate reader at 600 nm using 30% acetic acid in water as the blank and TSB as negative control. **a**) Confocal fluorescence images (2D and 3D) of *S. aureus* (i,ii), *E. coli* (iii,iv), *Klebsiella spp.* (v,vi), *Enterobacter spp.* (vii,viii), *Bacillus spp.* (ix,x) and *Shigella spp.* (xi,xii). Scale bars are indicated in  $\mu\text{m}$ . **b**) Category of the biofilm formation by six CM causing bacteria. The BF ability of the tested bacteria were classified as

follows: NBF, non-biofilm formers optical density (OD)  $\leq$  optical density cut-off (OD<sub>c</sub>); WBF, weak biofilm formers (OD<sub>c</sub> < OD  $\leq$  2 x OD<sub>c</sub>); MBF, moderate biofilm formers (2 x OD<sub>c</sub> < OD  $\leq$  4 x OD<sub>c</sub>), SBF, strong biofilm formers (OD > 4 x OD<sub>c</sub>). The OD<sub>c</sub> value was set as 0.045 and the mean OD of the negative control was 0.039 $\pm$ 0.002. Thus, bacterial biofilms were divided into breakpoint categories; OD < 0.045 non-biofilm producers; OD  $\geq$  0.046 but  $\leq$  0.090 weak biofilm producers;  $\geq$ OD 0.091– $\leq$ 0.180 moderate or partial biofilm producers; >0.181 strong biofilm producers. The results are presented as the mean  $\pm$  SD, and post hoc Bonferroni test was used to compare the biofilm OD<sub>600</sub> mean values ( $p$ <0.05).

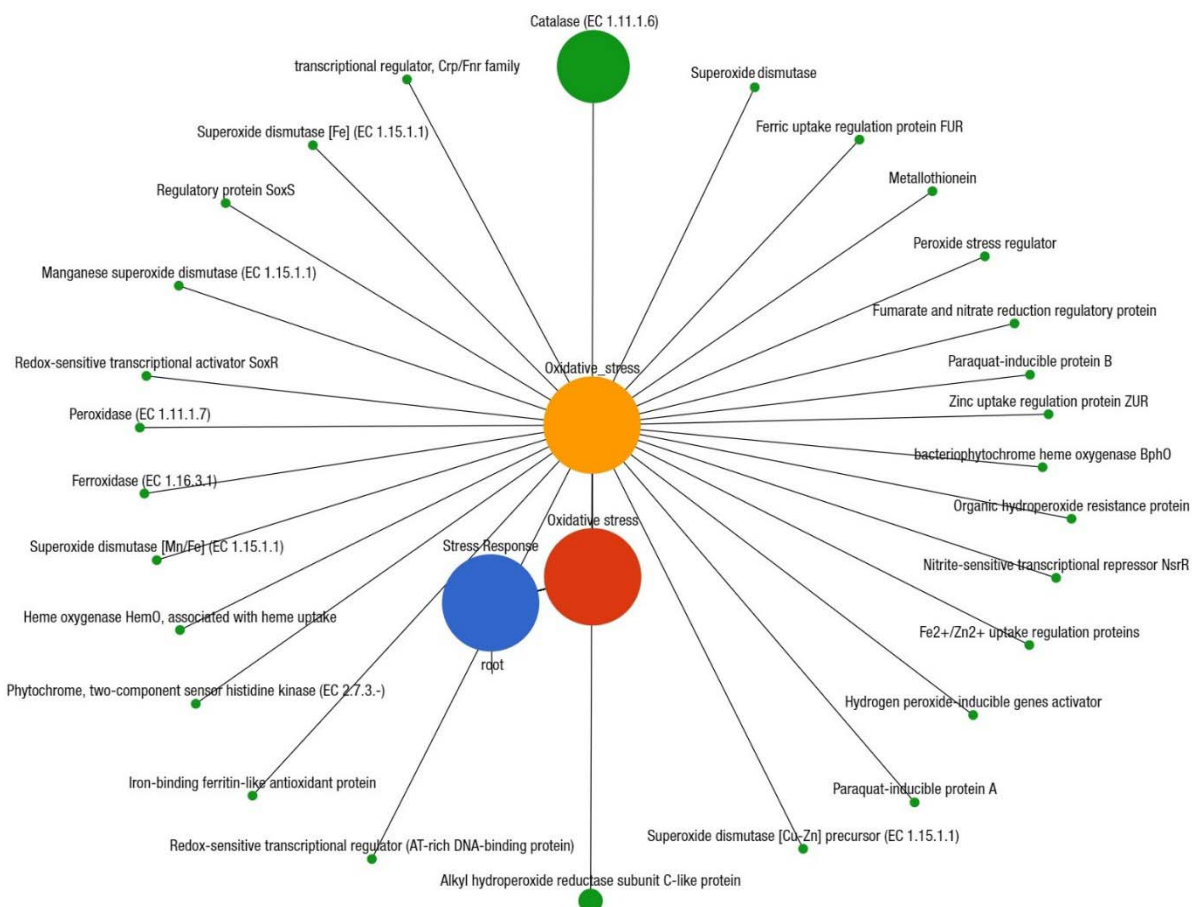

**Fig. 9** Projection of the clinical mastitis (CM) milk metagenome onto KEGG pathways. The whole metagenome sequencing (WMS) reveals significant differences (Kruskal–Wallis test,  $p=0.001$ ) in functional microbial pathways. A total of 28 genes associated with oxidative stress were found in CM microbiomes. Black lines with green circles delineate the distribution of the stress related genes according to their class across the CM metagenome. The diameter of the circles indicates the relative abundance of the respective genes.



## Resistome diversity in bovine clinical mastitis microbiome, a signature concurrence

M. Nazmul Hoque, Arif Istiaq, Rebecca A. Clement, Keylie M. Gibson, Otun Saha, Ovinu Kibria Islam, Ruhshan Ahmed Abir,  
 Munawar Sultana, AMAM Zonaed Siddiki, Keith A. Crandall, M. Anwar Hossain

Table 1: Antibiotic resistance pattern of bacteria [n (%) of isolates] associated with bovine clinical mastitis (CM).

| Antibiotic | Content per disk | Breakpoint to declare resistance ( $\leq$ ) | <i>S. aureus</i> (n=56) | <i>E. coli</i> (n=54) | <i>Klebsiella</i> spp. (n=42) | <i>Enterobacter</i> spp. (n=26) | <i>Bacillus</i> spp. (n=31) | <i>Shigella</i> spp. (n=12) |
|------------|------------------|---------------------------------------------|-------------------------|-----------------------|-------------------------------|---------------------------------|-----------------------------|-----------------------------|
| AMP        | 10 $\mu$ g       | 28 mm                                       | 48 (85.71)              | 42 (77.78)            | 36 (85.71)                    | 24 (92.30)                      | 25 (80.64)                  | 10 (83.33)                  |
| DOX        | 30 $\mu$ g       | 23 mm                                       | 49 (87.50)              | 46 (85.18)            | 39 (92.86)                    | 22 (84.61)                      | 26 (83.87)                  | 10 (83.33)                  |
| TCN        | 30 $\mu$ g       | 23 mm                                       | 46 (82.14)              | 50 (92.59)            | 38 (90.48)                    | 24 (92.30)                      | 11 (35.48)                  | 12 (100)                    |
| CIP        | 10 $\mu$ g       | 20 mm                                       | 28 (50.0)               | 22 (40.74)            | 18 (42.86)                    | 8 (30.77)                       | 13 (41.94)                  | 4 (33.33)                   |
| IMP        | 10 $\mu$ g       | 22 mm                                       | 10 (17.86)              | 12 (22.22)            | 11 (26.19)                    | 5 (19.23)                       | 2 (6.45)                    | 3 (25.0)                    |
| CHL        | 30 $\mu$ g       | 12 mm                                       | 32 (57.14)              | 34 (62.96)            | 23 (54.76)                    | 18 (69.23)                      | 6 (19.35)                   | 6 (50.00)                   |
| GEN        | 10 $\mu$ g       | 12 mm                                       | 22 (39.28)              | 23 (42.60)            | 21 (50.0)                     | 4 (15.38)                       | 23 (74.19)                  | 5 (41.67)                   |
| NAL        | 30 $\mu$ g       | 16 mm                                       | ND                      | 46 (85.18)            | 36 (85.71)                    | 20 (76.92)                      | 23 (74.19)                  | 12 (100)                    |
| NIT        | 10 $\mu$ g       | 64 mm                                       | 28 (50.0)               | 32 (59.25)            | 30 (71.42)                    | 12 (46.15)                      | ND                          | 4 (33.33)                   |
| CFX        | 30 $\mu$ g       | 24 mm                                       | 14 (25.0)               | 14 (25.0)             | 12 (28.57)                    | 8 (30.77)                       | ND                          | 2 (16.67)                   |
| VAN        | 30 $\mu$ g       | 20 mm                                       | 12 (21.42)              | ND                    | ND                            | ND                              | 6 (19.35)                   | ND                          |
| ERY        | 15 $\mu$ g       | 20 mm                                       | 41 (73.21)              | ND                    | ND                            | ND                              | 19 (61.29)                  | ND                          |

n: total number of isolates tested; ND: Not done; AMP: Ampicillin; DOX: Doxycycline; TCN: Tetracycline; CIP: Ciprofloxacin; IMP: Imipenem; CHL: Chloramphenicol; GEN: Gentamycin; NAL: Nalidixic acid; NIT: Nitrofurantoin; CFX: Cefoxitin; VAN: Vancomycin; ERY: Erythromycin.
